# Supplementary material for: The Evolution of Musical Diversity: The Key Role of Vertical Transmission
Source: PLoS One. 2016 Mar 30;11(3):e0151570. doi: 10.1371/journal.pone.0151570 (PMC4814106; doi:10.1371/journal.pone.0151570)
Supplement: S1 Dataset — Column 1: 58 musical patrimonies (a patrimony is a set of musical features shared by a population). They are described in the Table 1. Characters 1–161: repertoire; Characters 162–224: instrument; Characters 225–288: rhythmic cell; Characters 289–302: metric; Characters 303–315: musical scale; Characters 316–318: polyphonic processes; Characters 319–320: vocal form; Characters 321–322: vocal technique. (XLSX) [file pone.0151570.s001.xlsx]

## Sheet: Feuil1
Colonne1	Abale	Abambo	abattage des arbres	Abwema/Ibwema	Agombe Nero	Akomamba	Amboko	Ampaza	Ampoli	Aringabodu	arc en bouche	Beka	Berceuse	Bodi	Boluma	Bubeyi	Ngoye	Buma	Bumba	Bwiti akoa	Bwiti Dissumba	Bwiti Mitombwé	bwiti Michoko	Bwiti Ndea	Bwiti Nzobi	Chasse	Chasse à l'éléphant	contes	Deke	Dibanzi	djumbu (jueaux	Diboka/Dibogha	digjangu	Ditsatsa	disesa	Ebanighi	Ecrasage	edzengi (yeyi)	Ekunda	Elenge	Elombo	Enangue (moburu)	ghebunzi(mononge/ngungu)	Gheyombo	gjanga	Gol	Inkinda	Inonga	Ivanga
	1	2	3	4	5	6	7	8	9	10	11	12	13	14	15	16	17	18	19	20	21	22	23	24	25	26	27	28	29	30	31	32	33	34	35	36	37	38	39	40	41	42	43	44	45	46	47	48	49
extragroupe	0	0	0	0	0	0	0	0	0	0	0	0	0	0	0	0	0	0	0	0	0	0	0	0	0	0	0	0	0	0	0	0	0	0	0	0	0	0	0	0	0	0	0	0	0	0	0	0	0
ngomsekaseka	0	0	0	0	0	0	0	0	0	0	1	0	1	0	0	0	0	0	0	0	0	0	0	0	0	0	1	1	0	0	0	0	0	0	0	0	0	0	0	0	0	0	0	0	0	0	1	0	0
tsoghosekaseka	0	0	0	0	0	0	0	0	0	0	1	0	1	0	0	0	0	0	0	0	1	0	1	1	0	1	0	1	0	0	0	0	0	0	0	0	0	0	0	0	0	0	1	1	0	0	0	0	0
ngommimongo	0	0	0	0	0	0	0	0	0	0	1	0	1	0	0	0	0	0	0	0	0	0	0	0	0	1	1	1	0	0	0	0	0	0	0	0	0	0	0	0	0	0	0	0	0	0	1	0	0
babongoytranquille	0	0	0	0	0	0	0	0	0	0	1	0	1	0	1	0	0	0	0	0	1	0	1	?	0	1	0	1	0	0	0	0	0	0	0	0	0	0	0	0	0	0	1	1	0	0	0	0	0
babongotchibangavillage	0	0	0	0	0	0	0	0	0	0	1	0	1	0	1	0	0	0	0	0	1	0	1	?	0	1	0	1	0	0	0	0	0	0	0	0	0	0	0	0	0	0	0	0	0	0	0	0	0
babongonyoye2	0	0	?	0	0	0	0	0	0	1	1	0	1	0	1	0	1	0	0	0	1	0	1	1	0	1	0	1	0	0	0	0	0	0	0	0	0	0	0	0	0	0	1	1	0	0	0	0	0
tsoghonyoye2	0	0	?	0	0	0	0	0	0	1	1	0	1	0	0	0	0	0	0	0	1	0	1	1	0	0	0	1	0	0	0	0	0	0	0	0	0	0	0	0	0	0	1	1	0	0	0	0	0
tsoghomatadi	0	0	1	0	0	0	0	0	0	1	1	0	1	0	0	0	0	0	0	0	1	0	1	1	0	0	0	1	0	0	0	0	0	0	0	0	0	0	0	0	1	0	1	1	0	0	0	0	0
baghamademambi	0	0	0	?	0	0	0	0	0	0	0	0	?	0	0	0	0	0	0	0	0	0	0	0	1	0	0	?	0	1	0	1	0	?	0	0	0	0	0	0	1	0	0	0	1	0	0	0	0
PunudeMandilou	0	0	0	0	0	0	0	0	0	?	?	0	?	0	0	0	0	0	0	0	1	0	1	0	0	0	0	0	0	1	0	0	0	0	0	0	0	0	0	0	1	0	0	0	0	0	0	0	0
PunudeDouano 2	0	0	?	0	0	0	0	0	0	?	?	0	1	0	0	0	0	0	0	0	1	0	0	0	0	0	0	0	0	0	0	0	0	?	0	0	0	0	0	0	1	0	0	0	0	0	0	0	0
NgomMouallo	0	0	1	0	0	0	0	0	0	1	1	0	1	0	0	1	0	0	0	0	0	0	1	0	0	1	1	1	0	0	0	0	?	0	0	0	0	0	0	0	1	0	0	0	0	0	1	0	0
BabongoNGando	0	0	0	?	0	0	0	0	0	0	1	0	1	0	?	0	0	1	0	0	1	0	1	1	0	1	0	1	0	0	0	0	0	0	0	0	0	0	0	0	0	0	0	0	0	0	?	0	0
NgomBolapisa	0	0	1	?	0	0	0	0	0	1	0	0	1	0	0	0	0	0	0	0	0	0	0	0	0	0	1	1	0	0	0	0	1	0	0	0	0	0	0	0	0	0	0	0	0	0	1	0	0
BabongoMoyiko	0	0	1	1	0	0	0	0	0	1	0	0	1	?	?	?	1	0	0	0	0	0	0	0	0	1	0	1	0	0	0	0	0	0	0	0	0	0	0	0	0	0	0	0	0	0	?	0	0
ApinjidestMartin	0	0	1	0	0	0	0	0	0	0	1	0	1	0	0	0	0	0	0	0	1	1	0	0	0	0	1	1	0	0	0	0	0	0	0	0	1	0	0	0	1	0	0	0	0	0	?	0	0
NgomeManaMana	0	0	1	0	0	0	0	0	0	1	1	0	1	0	0	1	1	0	0	0	0	0	0	0	0	0	0	0	0	0	0	0	?	0	0	0	0	0	0	0	0	0	0	0	0	0	?	0	0
babongomanamana	0	0	0	0	0	0	0	0	0	0	?	0	1	?	?	1	?	0	0	0	0	0	0	0	0	?	0	?	0	0	0	0	0	0	0	0	0	0	0	0	0	0	0	0	0	0	?	0	0
bawandj Lipaka1	0	0	0	0	0	0	0	0	0	1	0	0	0	0	0	?	0	0	0	0	0	0	0	0	0	0	0	0	0	0	0	0	0	0	0	0	0	0	0	0	0	0	0	0	0	0	?	0	0
awandjiDume	0	0	0	0	0	0	0	0	0	1	1	0	1	0	0	1	0	0	0	0	0	0	0	1	0	1	0	1	0	0	0	0	0	0	0	0	0	0	0	0	0	0	0	0	0	0	?	0	0
BabongoDoume	0	0	0	0	0	0	0	0	0	1	1	0	1	0	?	1	0	0	0	0	0	0	0	1	0	1	0	1	0	0	0	0	0	0	0	0	0	0	0	0	0	0	0	0	0	0	?	0	0
BarimbeMandilou	0	0	0	0	0	0	0	0	0	0	0	0	0	0	0	0	0	0	1	0	1	0	1	0	0	1	0	0	0	0	0	1	0	1	1	0	0	0	0	0	1	0	0	0	0	0	?	0	0
GisiramandiloNgounié	0	0	0	0	0	0	0	0	0	0	0	0	1	0	0	0	0	0	0	0	1	0	1	0	0	0	0	1	0	0	0	0	0	0	0	0	0	0	0	0	1	0	0	0	0	0	?	0	0
Galoa	0	1	?	0	1	0	0	1	0	0	?	0	1	0	0	0	?	0	0	?	?	0	1	0	0	?	0	1	0	0	0	0	0	0	0	0	0	0	1	0	1	0	0	0	0	0	?	0	0
Orungu	0	0	?	0	0	0	0	1	0	0	?	0	?	0	0	0	?	0	0	?	1	0	?	0	0	?	?	1	0	0	0	0	0	0	0	0	0	0	1	1	1	0	0	0	0	0	?	0	1
Nkomi	0	0	?	0	?	0	0	1	0	0	?	0	?	0	0	0	?	0	0	1	1	0	?	0	0	?	0	1	0	0	0	0	0	0	0	0	0	0	1	1	1	0	0	0	0	0	?	0	0
Téké	0	0	1	0	0	0	0	0	0	0	1	0	1	0	0	0	?	0	0	0	0	0	0	0	0	1	0	1	0	0	0	0	0	0	0	1	0	0	0	0	0	0	0	0	0	0	?	0	0
TékédeObia1	0	0	?	0	0	0	0	0	0	0	?	0	?	?	0	0	?	0	0	0	0	0	0	0	0	0	0	?	0	0	0	0	0	0	0	0	0	0	0	0	0	0	0	0	0	0	?	0	0
TékédeObegue	0	0	?	0	0	0	0	0	0	0	1	0	?	?	0	0	?	0	0	0	0	0	0	0	0	0	0	?	0	0	0	0	0	0	0	0	0	0	0	0	0	0	0	0	0	0	?	0	0
ObambadeOndili	0	0	?	0	0	0	0	0	0	0	?	0	?	?	0	0	1	0	0	0	0	0	0	0	0	0	0	?	0	0	0	0	0	0	0	0	0	0	0	0	0	0	0	0	0	0	?	0	0
ObambadeEyouga1	0	0	?	0	0	0	0	0	0	1	?	0	?	?	0	0	1	0	0	0	0	0	0	0	0	0	0	?	0	0	0	0	0	0	0	0	0	0	0	0	0	0	0	0	0	0	?	0	0
ObambadeOmoye	0	0	?	0	0	0	0	0	0	0	1	0	?	?	0	0	1	0	0	0	0	0	0	0	0	0	0	1	0	0	0	0	0	0	0	0	0	0	0	0	0	0	0	0	0	0	?	0	0
Bakanighi	0	0	?	0	0	0	0	0	0	0	1	0	1	0	0	0	?	0	0	0	0	0	0	0	0	0	0	?	0	0	0	0	0	0	0	0	0	0	0	0	0	0	0	0	0	0	?	0	0
Eshira	0	0	?	0	0	0	0	0	0	0	?	0	1	?	0	0	0	0	0	0	1	0	1	0	0	0	0	?	0	0	0	0	0	0	0	0	0	0	0	0	1	0	?	?	0	0	?	0	0
Sango	0	0	1	0	0	0	0	0	0	0	?	0	1	0	0	0	0	0	0	0	1	0	0	0	0	0	0	1	0	0	0	0	0	0	0	0	0	0	0	0	0	0	?	?	0	0	?	1	0
SangodeDyanga	0	0	1	0	0	0	0	0	0	0	?	0	1	0	0	0	0	0	0	0	1	0	1	0	0	0	0	0	0	0	0	0	0	0	0	0	0	0	0	0	1	0	?	?	0	0	?	1	0
Puvi	0	0	?	0	0	0	0	0	0	0	?	0	1	?	0	?	0	0	0	0	1	0	1	0	0	1	0	?	0	0	0	0	0	0	0	0	0	0	0	0	1	0	?	?	0	0	?	0	0
Simba	0	0	?	0	0	0	0	0	0	0	?	0	?	?	0	?	0	0	0	0	1	0	1	0	0	0	0	?	0	0	0	0	0	0	0	0	0	0	0	0	?	0	?	?	0	0	?	0	0
Ntumu	0	0	?	0	0	1	0	0	0	0	?	0	?	0	0	0	0	0	0	0	?	0	0	?	0	?	?	1	0	0	0	0	0	0	0	0	?	0	0	0	0	1	0	0	0	?	?	0	0
Mveng	0	0	?	0	0	?	0	0	0	0	?	0	1	0	0	0	0	0	0	0	0	0	0	1	0	?	?	1	0	0	0	0	0	0	0	0	1	0	0	0	0	1	0	0	0	1	?	0	0
Okak	0	0	?	0	0	?	0	0	0	0	?	0	?	?	0	0	0	0	0	0	0	0	0	0	0	?	0	?	0	0	0	0	0	0	0	0	?	0	0	0	0	?	0	0	0	?	?	0	0
Fang	0	0	?	0	0	?	0	0	0	0	1	0	1	0	0	0	0	0	0	0	0	0	0	?	0	?	?	1	0	0	0	0	0	0	0	0	?	0	0	0	0	1	0	0	0	1	?	0	0
Baka	1	0	0	0	0	?	0	0	0	0	1	1	1	0	0	0	?	1	1	0	?	0	0	?	0	1	1	1	0	0	1	0	0	0	0	0	0	1	0	0	0	0	0	0	0	0	?	0	0
BakoyaEkata	0	0	?	1	0	0	0	0	0	0	?	0	?	?	0	0	?	0	1	0	0	0	0	0	0	1	1	?	0	0	0	0	0	0	0	0	0	0	0	0	0	0	0	0	0	0	?	0	0
Ngom	0	0	?	0	0	0	1	0	0	0	?	0	1	0	0	?	?	0	0	0	0	0	0	0	0	1	?	1	0	0	0	0	?	0	0	0	0	0	0	0	0	0	0	0	0	0	?	0	0
BakoyaImbong	0	0	?	1	0	0	1	0	0	0	?	0	?	?	0	0	?	0	0	0	0	0	0	0	0	1	0	?	0	0	0	0	0	0	0	0	0	0	0	0	0	0	0	0	0	0	?	0	0
Mwessa	0	0	?	0	0	0	0	0	1	1	?	0	1	?	0	0	0	0	0	0	0	0	0	0	0	0	0	1	0	0	0	0	0	0	1	0	0	0	0	0	0	0	0	0	0	0	?	0	0
KotadeEgoPoma	0	0	?	0	0	0	1	0	0	0	?	0	?	?	0	0	0	0	0	0	0	0	0	0	0	0	0	?	1	0	0	0	0	0	0	0	0	0	0	0	0	0	0	0	0	0	?	0	0
kweledeMazingo	0	0	?	0	0	0	0	0	0	0	1	1	?	?	0	0	0	0	0	0	0	0	0	0	0	0	0	?	1	0	0	0	0	0	0	0	?	0	0	0	0	0	0	0	0	0	?	0	0
BabongoEkala2	0	0	?	0	0	0	0	0	0	0	?	0	?	?	0	0	?	0	0	0	0	0	0	0	0	0	0	?	0	0	0	0	0	0	0	0	0	0	0	0	0	0	0	0	0	0	?	0	0
BabongoBoumango	0	0	?	0	0	0	0	0	0	0	?	0	1	?	0	0	1	0	0	0	0	0	0	0	0	1	1	?	0	0	0	0	0	0	0	0	0	0	0	0	0	0	0	0	0	0	?	0	0
Bahumbu	0	0	?	0	0	0	0	0	0	1	?	0	?	0	0	0	1	0	0	0	0	0	0	0	0	?	0	?	0	0	0	0	0	0	0	0	0	0	0	0	0	0	0	0	0	0	?	0	0
Mbahouins	0	0	?	0	0	0	0	0	0	0	1	0	1	0	0	0	1	0	0	0	0	0	0	0	0	0	0	1	0	0	0	0	?	0	0	0	0	0	0	0	0	0	0	0	0	0	?	0	0
BabongodeIwatchi	0	0	?	0	0	0	0	0	0	0	?	0	?	?	?	1	0	0	0	0	0	0	0	0	0	?	0	?	0	0	0	0	0	0	0	0	0	0	0	0	0	0	0	0	0	0	?	0	0
BabongoMoghon	0	0	?	0	0	0	0	0	0	0	?	0	1	?	?	1	0	0	0	0	0	0	0	0	0	?	0	?	0	0	0	0	0	0	0	0	0	0	0	0	0	0	0	0	0	0	?	0	0
BabongoMakoula	0	0	?	0	0	0	0	0	0	0	?	0	?	0	?	1	0	0	0	0	0	0	1	0	0	1	0	?	0	0	0	0	0	0	0	0	0	0	0	0	0	0	0	0	0	0	?	0	0
BabongoMidouma	0	0	?	0	0	0	0	0	0	0	?	0	?	0	?	1	0	0	0	0	1	0	1	0	0	1	1	?	0	0	0	0	0	0	0	0	0	0	0	0	0	0	0	0	0	0	?	0	0
Tsoghoestuaire	0	0	?	0	0	0	0	0	0	0	1	0	1	0	0	?	?	0	0	0	1	0	1	0	0	?	0	?	0	0	0	0	0	0	0	0	0	0	0	0	?	0	?	?	0	0	0	0	0
[truncated: 273 more columns]
