# Supplementary material for: The Evolution of Musical Diversity: The Key Role of Vertical Transmission
Source: PLOS journal article supplement (doi:10.1371/journal.pone.0151570), 2016-03-30
Supplement: S3 (10.1371/journal.pone.0151570.s003) [file journal.pone.0151570.s003]

|    |                     |                                                   |                                                                                      |
|----|---------------------|---------------------------------------------------|--------------------------------------------------------------------------------------|
| 1  | Abale               | Hunt and healing ceremonies repertoire.           | Absence is coded by 0<br>Presence is coded by 1<br>Missing information is coded by ? |
| 2  | Abambo              | Spirit ceremonies repertoire                      | Absence is coded by 0<br>Presence is coded by 1<br>Missing information is coded by ? |
| 3  | Abattage des arbres | Logging repertoire                                | Absence is coded by 0<br>Presence is coded by 1<br>Missing information is coded by ? |
| 4  | Abwema/Ibwema       | Hunt repertoire                                   | Absence is coded by 0<br>Presence is coded by 1<br>Missing information is coded by ? |
| 5  | Agombe Nero         | Ancestor cult repertoire                          | Absence is coded by 0<br>Presence is coded by 1<br>Missing information is coded by ? |
| 6  | Akomamba            | Entertainment repertoire                          | Absence is coded by 0<br>Presence is coded by 1<br>Missing information is coded by ? |
| 7  | Amboko              | Entertainment repertoire                          | Absence is coded by 0<br>Presence is coded by 1<br>Missing information is coded by ? |
| 8  | Ampaza              | Twins ceremonies repertoire                       | Absence is coded by 0<br>Presence is coded by 1<br>Missing information is coded by ? |
| 9  | Ampoli              | Male brotherhood ceremonies repertoire            | Absence is coded by 0<br>Presence is coded by 1<br>Missing information is coded by ? |
| 10 | Aringa/bodu         | Entertainment repertoire                          | Absence is coded by 0<br>Presence is coded by 1<br>Missing information is coded by ? |
| 11 | Arc en bouche       | Entertainment and tales repertoire with mouth bow | Absence is coded by 0<br>Presence is coded by 1<br>Missing information is coded by ? |
| 12 | Beka                | Circumcision ceremonies repertoire                | Absence is coded by 0<br>Presence is coded by 1<br>Missing information is coded by ? |
| 13 | Berceuse            | Lullabies repertoire                              | Absence is coded by 0<br>Presence is coded by 1<br>Missing information is coded by ? |
| 14 | Bodi                | Male brotherhood ceremonies repertoire            | Absence is coded by 0<br>Presence is coded by 1<br>Missing information is coded by ? |
| 15 | Boluma              | Hunt ceremonies repertoire                        | Absence is coded by 0<br>Presence is coded by 1<br>Missing information is coded by ? |
| 16 | Bubeyi              | Male brotherhood ceremonies repertoire            | Absence is coded by 0<br>Presence is coded by 1<br>Missing information is coded by ? |
| 17 | Ngoye               | Male brotherhood ceremonies repertoires           | Absence is coded by 0<br>Presence is coded by 1<br>Missing information is coded by ? |
| 18 | Buma                | Male brotherhood ceremonies                       | Absence is coded by 0                                                                |

|    |                     |                                                    |                                                                                      |
|----|---------------------|----------------------------------------------------|--------------------------------------------------------------------------------------|
|    |                     | repertoires.                                       | Presence is coded by 1<br>Missing information is coded by ?                          |
| 19 | Bumba               | Divination ceremonies repertoire                   | Absence is coded by 0<br>Presence is coded by 1<br>Missing information is coded by ? |
| 20 | Bwiti akoa          | Male brotherhood ceremonies repertoire             | Absence is coded by 0<br>Presence is coded by 1<br>Missing information is coded by ? |
| 21 | Bwiti Dissumba      | Male brotherhood ceremonies repertoire             | Absence is coded by 0<br>Presence is coded by 1<br>Missing information is coded by ? |
| 22 | Bwiti Mitombwé      | Healing ceremonies repertoire                      | Absence is coded by 0<br>Presence is coded by 1<br>Missing information is coded by ? |
| 23 | Bwiti Michoko       | Healing ceremonies repertoire                      | Absence is coded by 0<br>Presence is coded by 1<br>Missing information is coded by ? |
| 24 | Bwiti Ndea          | Male brotherhood ceremonies repertoire             | Absence is coded by 0<br>Presence is coded by 1<br>Missing information is coded by ? |
| 25 | Bwiti Nzobi         | Male brotherhood ceremonies repertoire             | Absence is coded by 0<br>Presence is coded by 1<br>Missing information is coded by ? |
| 26 | Chasse              | Different hunt ceremonies repertoires              | Absence is coded by 0<br>Presence is coded by 1<br>Missing information is coded by ? |
| 27 | Chasse à l'éléphant | Elephant hunt ceremonies repertoires               | Absence is coded by 0<br>Presence is coded by 1<br>Missing information is coded by ? |
| 28 | Contes              | Tales repertoire                                   | Absence is coded by 0<br>Presence is coded by 1<br>Missing information is coded by ? |
| 29 | Deke                | Healing ceremonies repertoire                      | Absence is coded by 0<br>Presence is coded by 1<br>Missing information is coded by ? |
| 30 | Dibanzi             | Female brotherhood ceremonies repertoire           | Absence is coded by 0<br>Presence is coded by 1<br>Missing information is coded by ? |
| 31 | Djumbu              | Twins ceremonies repertoire                        | Absence is coded by 0<br>Presence is coded by 1<br>Missing information is coded by ? |
| 32 | Diboka/Dibogha      | Mourning and healing ceremonies repertoire         | Absence is coded by 0<br>Presence is coded by 1<br>Missing information is coded by ? |
| 33 | Digjangu            | Big chief mourning ceremonies repertoire           | Absence is coded by 0<br>Presence is coded by 1<br>Missing information is coded by ? |
| 34 | Ditsatsa            | Male brotherhood ceremonies repertoire             | Absence is coded by 0<br>Presence is coded by 1<br>Missing information is coded by ? |
| 35 | Disesa              | Male brotherhood and healing ceremonies repertoire | Absence is coded by 0<br>Presence is coded by 1<br>Missing information is coded by ? |
| 36 | Ebanighi            | Male brotherhood ceremonies                        | Absence is coded by 0                                                                |

|    |                  |                                                                      |                                                                                      |
|----|------------------|----------------------------------------------------------------------|--------------------------------------------------------------------------------------|
|    |                  | repertoire                                                           | Presence is coded by 1<br>Missing information is coded by ?                          |
| 37 | Ecrasage         | Crushing peanuts repertoire                                          | Absence is coded by 0<br>Presence is coded by 1<br>Missing information is coded by ? |
| 38 | Edzengi          | Forest protection and maintaining social order ceremonies repertoire | Absence is coded by 0<br>Presence is coded by 1<br>Missing information is coded by ? |
| 39 | Ekunda           | Entertainment repertoire                                             | Absence is coded by 0<br>Presence is coded by 1<br>Missing information is coded by ? |
| 40 | Elenge           | Female spirit ceremonies repertoire                                  | Absence is coded by 0<br>Presence is coded by 1<br>Missing information is coded by ? |
| 41 | Elombo           | Female healing brotherhood ceremonies repertoire                     | Absence is coded by 0<br>Presence is coded by 1<br>Missing information is coded by ? |
| 42 | Enangue (moburu) | Entertainment repertoire                                             | Absence is coded by 0<br>Presence is coded by 1<br>Missing information is coded by ? |
| 43 | Ghebunzi         | Male brotherhood ceremonies repertoire                               | Absence is coded by 0<br>Presence is coded by 1<br>Missing information is coded by ? |
| 44 | Gheyombo         | Twins ceremonies repertoire                                          | Absence is coded by 0<br>Presence is coded by 1<br>Missing information is coded by ? |
| 45 | Gjanga           | Twins ceremonies repertoire                                          | Absence is coded by 0<br>Presence is coded by 1<br>Missing information is coded by ? |
| 46 | Gol              | Entertainment repertoire                                             | Absence is coded by 0<br>Presence is coded by 1<br>Missing information is coded by ? |
| 47 | Inkinda          | Circumcision ceremonies repertoire                                   | Absence is coded by 0<br>Presence is coded by 1<br>Missing information is coded by ? |
| 48 | Inonga           | Entertainment repertoire                                             | Absence is coded by 0<br>Presence is coded by 1<br>Missing information is coded by ? |
| 49 | Ivanga           | Female brotherhood ceremonies repertoire                             | Absence is coded by 0<br>Presence is coded by 1<br>Missing information is coded by ? |
| 50 | Kenge            | Mourning ceremonies repertoire                                       | Absence is coded by 0<br>Presence is coded by 1<br>Missing information is coded by ? |
| 51 | Kondjo           | Entertainment repertoire                                             | Absence is coded by 0<br>Presence is coded by 1<br>Missing information is coded by ? |
| 52 | Kono             | Male brotherhood ceremonies repertoire                               | Absence is coded by 0<br>Presence is coded by 1<br>Missing information is coded by ? |
| 53 | Konzi            | Healing ceremonies repertoire                                        | Absence is coded by 0<br>Presence is coded by 1<br>Missing information is coded by ? |
| 54 | Koro             | Entertainment repertoire                                             | Absence is coded by 0                                                                |

|    |                 |                                                  |                                                                                      |
|----|-----------------|--------------------------------------------------|--------------------------------------------------------------------------------------|
|    |                 |                                                  | Presence is coded by 1<br>Missing information is coded by ?                          |
| 55 | Kose            | Entertainment repertoire                         | Absence is coded by 0<br>Presence is coded by 1<br>Missing information is coded by ? |
| 56 | Kudwé           | Circumcision ceremonies repertoire               | Absence is coded by 0<br>Presence is coded by 1<br>Missing information is coded by ? |
| 57 | Kunda2          | Entertainment repertoire                         | Absence is coded by 0<br>Presence is coded by 1<br>Missing information is coded by ? |
| 58 | Laka            | Entertainment repertoire                         | Absence is coded by 0<br>Presence is coded by 1<br>Missing information is coded by ? |
| 59 | Langhu          | Hunt ceremonies repertoire                       | Absence is coded by 0<br>Presence is coded by 1<br>Missing information is coded by ? |
| 60 | Lenguégué       | Entertainment repertoire                         | Absence is coded by 0<br>Presence is coded by 1<br>Missing information is coded by ? |
| 61 | Likobo          | Children repertoire                              | Absence is coded by 0<br>Presence is coded by 1<br>Missing information is coded by ? |
| 62 | Lingwala        | Entertainment repertoire                         | Absence is coded by 0<br>Presence is coded by 1<br>Missing information is coded by ? |
| 63 | Lisimbu         | Female brotherhood ceremonies repertoire         | Absence is coded by 0<br>Presence is coded by 1<br>Missing information is coded by ? |
| 64 | Lulu            | Entertainment repertoire                         | Absence is coded by 0<br>Presence is coded by 1<br>Missing information is coded by ? |
| 65 | Mabandji        | Female healing brotherhood ceremonies repertoire | Absence is coded by 0<br>Presence is coded by 1<br>Missing information is coded by ? |
| 66 | Mabundi         | Female healing brotherhood ceremonies repertoire | Absence is coded by 0<br>Presence is coded by 1<br>Missing information is coded by ? |
| 67 | Gheveghe Maboma | Mourning ceremonies repertoire                   | Absence is coded by 0<br>Presence is coded by 1<br>Missing information is coded by ? |
| 68 | Madamba         | Entertainment repertoire                         | Absence is coded by 0<br>Presence is coded by 1<br>Missing information is coded by ? |
| 69 | Madjangu        | Entertainment repertoire                         | Absence is coded by 0<br>Presence is coded by 1<br>Missing information is coded by ? |
| 70 | Magha           | Male brotherhood ceremonies repertoire           | Absence is coded by 0<br>Presence is coded by 1<br>Missing information is coded by ? |
| 71 | Malamu          | Female brotherhood repertoire                    | Absence is coded by 0<br>Presence is coded by 1<br>Missing information is coded by ? |
| 72 | Mandolo         | Entertainment repertoire                         | Absence is coded by 0                                                                |

|    |              |                                                    |                                                                                      |
|----|--------------|----------------------------------------------------|--------------------------------------------------------------------------------------|
|    |              |                                                    | Presence is coded by 1<br>Missing information is coded by ?                          |
| 73 | Manele       | Female brotherhood repertoire                      | Absence is coded by 0<br>Presence is coded by 1<br>Missing information is coded by ? |
| 74 | Mangadi      | Healing ceremonies repertoire                      | Absence is coded by 0<br>Presence is coded by 1<br>Missing information is coded by ? |
| 75 | Mangelebo    | Mourning ceremonies repertoire.                    | Absence is coded by 0<br>Presence is coded by 1<br>Missing information is coded by ? |
| 76 | Mariage      | Wedding ceremonies repertoire                      | Absence is coded by 0<br>Presence is coded by 1<br>Missing information is coded by ? |
| 77 | Mavunda      | healing ceremonies repertoire                      | Absence is coded by 0<br>Presence is coded by 1<br>Missing information is coded by ? |
| 78 | Mawandji     | Spirit and healing ceremonies repertoire           | Absence is coded by 0<br>Presence is coded by 1<br>Missing information is coded by ? |
| 79 | Mawass       | Twins ceremonies repertoire                        | Absence is coded by 0<br>Presence is coded by 1<br>Missing information is coded by ? |
| 80 | Mbla         | Entertainment repertoire                           | Absence is coded by 0<br>Presence is coded by 1<br>Missing information is coded by ? |
| 81 | Mbali        | Entertainment repertoire                           | Absence is coded by 0<br>Presence is coded by 1<br>Missing information is coded by ? |
| 82 | Mbadi        | Entertainment repertoire                           | Absence is coded by 0<br>Presence is coded by 1<br>Missing information is coded by ? |
| 83 | Mbudi        | Entertainment repertoire                           | Absence is coded by 0<br>Presence is coded by 1<br>Missing information is coded by ? |
| 84 | Mbumba Yano  | Spirit and healing ceremonies repertoire           | Absence is coded by 0<br>Presence is coded by 1<br>Missing information is coded by ? |
| 85 | Mebassi      | Entertainment repertoire                           | Absence is coded by 0<br>Presence is coded by 1<br>Missing information is coded by ? |
| 86 | Medzang      | Entertainment repertoire                           | Absence is coded by 0<br>Presence is coded by 1<br>Missing information is coded by ? |
| 87 | Mekom/Makuma | Entertainment part of ritual ceremonies repertoire | Absence is coded by 0<br>Presence is coded by 1<br>Missing information is coded by ? |
| 88 | Mekueng      | Entertainment with snail shells repertoire         | Absence is coded by 0<br>Presence is coded by 1<br>Missing information is coded by ? |
| 89 | Meloka       | Entertainment repertoire                           | Absence is coded by 0<br>Presence is coded by 1<br>Missing information is coded by ? |
| 90 | Mengan       | Entertainment repertoire                           | Absence is coded by 0                                                                |

|     |              |                                                 |                                                                                      |
|-----|--------------|-------------------------------------------------|--------------------------------------------------------------------------------------|
|     |              |                                                 | Presence is coded by 1<br>Missing information is coded by ?                          |
| 91  | Mikudu       | Entertainment repertoire                        | Absence is coded by 0<br>Presence is coded by 1<br>Missing information is coded by ? |
| 92  | Mimbwiri     | Spirit and healing ceremonies repertoire        | Absence is coded by 0<br>Presence is coded by 1<br>Missing information is coded by ? |
| 93  | Minonze2     | Entertainment repertoire                        | Absence is coded by 0<br>Presence is coded by 1<br>Missing information is coded by ? |
| 94  | Moburu       | Entertainment repertoire                        | Absence is coded by 0<br>Presence is coded by 1<br>Missing information is coded by ? |
| 95  | Mogoulou     | healing ceremonies repertoire                   | Absence is coded by 0<br>Presence is coded by 1<br>Missing information is coded by ? |
| 96  | Mokuya       | Male brotherhood ceremonies repertoire          | Absence is coded by 0<br>Presence is coded by 1<br>Missing information is coded by ? |
| 97  | Mokuyi       | Male brotherhood ceremonies repertoire          | Absence is coded by 0<br>Presence is coded by 1<br>Missing information is coded by ? |
| 98  | Mopfougou    | Entertainment repertoire                        | Absence is coded by 0<br>Presence is coded by 1<br>Missing information is coded by ? |
| 99  | Mosango      | Circumcision ceremonies repertoire              | Absence is coded by 0<br>Presence is coded by 1<br>Missing information is coded by ? |
| 100 | Mudimu       | Male brotherhood ceremonies repertoire          | Absence is coded by 0<br>Presence is coded by 1<br>Missing information is coded by ? |
| 101 | Mujajo       | Entertainment repertoire                        | Absence is coded by 0<br>Presence is coded by 1<br>Missing information is coded by ? |
| 102 | Mujishi      | Mourning ceremonies repertoire                  | Absence is coded by 0<br>Presence is coded by 1<br>Missing information is coded by ? |
| 103 | Mukwanga     | Entertainment repertoire                        | Absence is coded by 0<br>Presence is coded by 1<br>Missing information is coded by ? |
| 104 | Mundukwe     | Hunt and male brotherhood ceremonies repertoire | Absence is coded by 0<br>Presence is coded by 1<br>Missing information is coded by ? |
| 105 | Mungala      | Circumcision and twins ceremonies repertoire    | Absence is coded by 0<br>Presence is coded by 1<br>Missing information is coded by ? |
| 106 | Muri (yengé) | Male brotherhood ceremonies repertoire          | Absence is coded by 0<br>Presence is coded by 1<br>Missing information is coded by ? |
| 107 | Muyongo      | Mourning ceremonies repertoire                  | Absence is coded by 0<br>Presence is coded by 1<br>Missing information is coded by ? |
| 108 | Mvet         | Male withdrawal of mourning                     | Absence is coded by 0                                                                |

|     |                      |                                                  |                                                                                      |
|-----|----------------------|--------------------------------------------------|--------------------------------------------------------------------------------------|
|     |                      | and epic entertainment repertoire                | Presence is coded by 1<br>Missing information is coded by ?                          |
| 109 | Mvudi                | Male brotherhood ceremonies repertoire           | Absence is coded by 0<br>Presence is coded by 1<br>Missing information is coded by ? |
| 110 | Mwiri                | Male brotherhood ceremonies repertoire           | Absence is coded by 0<br>Presence is coded by 1<br>Missing information is coded by ? |
| 111 | Ndamba               | entertainment repertoire                         | Absence is coded by 0<br>Presence is coded by 1<br>Missing information is coded by ? |
| 112 | Ndombi               | Plantation labour repertoire                     | Absence is coded by 0<br>Presence is coded by 1<br>Missing information is coded by ? |
| 113 | Ndji (èngne)         | Epic entertainment and war ceremonies repertoire | Absence is coded by 0<br>Presence is coded by 1<br>Missing information is coded by ? |
| 114 | Nganga               | Healing ceremonies repertoire                    | Absence is coded by 0<br>Presence is coded by 1<br>Missing information is coded by ? |
| 115 | Ngi                  | Ancestor cult ceremonies repertoire              | Absence is coded by 0<br>Presence is coded by 1<br>Missing information is coded by ? |
| 116 | Ngungutsogho (Gongo) | judge customary ceremonies repertoire            | Absence is coded by 0<br>Presence is coded by 1<br>Missing information is coded by ? |
| 117 | Ngungu               | Entertainment repertoire                         | Absence is coded by 0<br>Presence is coded by 1<br>Missing information is coded by ? |
| 118 | Ngwata               | Entertainment repertoire                         | Absence is coded by 0<br>Presence is coded by 1<br>Missing information is coded by ? |
| 119 | Ngwala               | Entertainment repertoire                         | Absence is coded by 0<br>Presence is coded by 1<br>Missing information is coded by ? |
| 120 | Njembé (Bo)          | Female brotherhood ceremonies repertoire         | Absence is coded by 0<br>Presence is coded by 1<br>Missing information is coded by ? |
| 121 | Nlup                 | Entertainment repertoire                         | Absence is coded by 0<br>Presence is coded by 1<br>Missing information is coded by ? |
| 122 | Nubeke               | Repertoire                                       | Absence is coded by 0<br>Presence is coded by 1<br>Missing information is coded by ? |
| 123 | Nyas                 | Male lifting of mourning ceremonies repertoire   | Absence is coded by 0<br>Presence is coded by 1<br>Missing information is coded by ? |
| 124 | Nzobi                | Male brotherhood ceremonies repertoire           | Absence is coded by 0<br>Presence is coded by 1<br>Missing information is coded by ? |
| 125 | Nzegho (nje)         | Male brotherhood ceremonies repertoire           | Absence is coded by 0<br>Presence is coded by 1<br>Missing information is coded by ? |
| 126 | Okungu               | Repertoire                                       | Absence is coded by 0                                                                |

|     |               |                                                  |                                                                                      |
|-----|---------------|--------------------------------------------------|--------------------------------------------------------------------------------------|
|     |               |                                                  | Presence is coded by 1<br>Missing information is coded by ?                          |
| 127 | Olamagha      | Mourning repertoire                              | Absence is coded by 0<br>Presence is coded by 1<br>Missing information is coded by ? |
| 128 | Olende        | Plantation labour repertoire                     | Absence is coded by 0<br>Presence is coded by 1<br>Missing information is coded by ? |
| 129 | Olobo         | Hunt preparation repertoire                      | Absence is coded by 0<br>Presence is coded by 1<br>Missing information is coded by ? |
| 130 | Ologo         | Female healing brotherhood ceremonies repertoire | Absence is coded by 0<br>Presence is coded by 1<br>Missing information is coded by ? |
| 131 | Ombosso       | Entertainment repertoire                         | Absence is coded by 0<br>Presence is coded by 1<br>Missing information is coded by ? |
| 132 | Ombwiri       | Female healing brotherhood ceremonies repertoire | Absence is coded by 0<br>Presence is coded by 1<br>Missing information is coded by ? |
| 133 | Omyas         | Entertainment repertoire                         | Absence is coded by 0<br>Presence is coded by 1<br>Missing information is coded by ? |
| 134 | Onaka         | Entertainment repertoire                         | Absence is coded by 0<br>Presence is coded by 1<br>Missing information is coded by ? |
| 135 | Onga          | Male brotherhood ceremonies repertoire           | Absence is coded by 0<br>Presence is coded by 1<br>Missing information is coded by ? |
| 136 | Onkila        | Twins and healing ceremonies repertoire          | Absence is coded by 0<br>Presence is coded by 1<br>Missing information is coded by ? |
| 137 | Otchendze     | Entertainment repertoire                         | Absence is coded by 0<br>Presence is coded by 1<br>Missing information is coded by ? |
| 138 | Ozila         | Entertainment repertoire                         | Absence is coded by 0<br>Presence is coded by 1<br>Missing information is coded by ? |
| 139 | Pani          | Entertainment repertoire                         | Absence is coded by 0<br>Presence is coded by 1<br>Missing information is coded by ? |
| 140 | Pêche barrage | Dam fishing repertoire                           | Absence is coded by 0<br>Presence is coded by 1<br>Missing information is coded by ? |
| 141 | Pêche poison  | Fishing with poison repertoire                   | Absence is coded by 0<br>Presence is coded by 1<br>Missing information is coded by ? |
| 142 | Pleine Lune   | Full moon repertoire                             | Absence is coded by 0<br>Presence is coded by 1<br>Missing information is coded by ? |
| 143 | Sanza         | Sanza entertainment repertoire                   | Absence is coded by 0<br>Presence is coded by 1<br>Missing information is coded by ? |
| 144 | Shaka         | Circumcision ceremony                            | Absence is coded by 0                                                                |



|     |                              |                                                  |                                                                                      |
|-----|------------------------------|--------------------------------------------------|--------------------------------------------------------------------------------------|
|     |                              | repertoire                                       | Presence is coded by 1<br>Missing information is coded by ?                          |
| 145 | Société                      | entertainment repertoire                         | Absence is coded by 0<br>Presence is coded by 1<br>Missing information is coded by ? |
| 146 | Tchengé                      | Repertoire                                       | Absence is coded by 0<br>Presence is coded by 1<br>Missing information is coded by ? |
| 147 | Travaux dans les champs      | Plantation labour repertoire                     | Absence is coded by 0<br>Presence is coded by 1<br>Missing information is coded by ? |
| 148 | Wanga                        | Mourning ceremonies repertoire                   | Absence is coded by 0<br>Presence is coded by 1<br>Missing information is coded by ? |
| 149 | Wose                         | Women repertoire                                 | Absence is coded by 0<br>Presence is coded by 1<br>Missing information is coded by ? |
| 150 | Wuya                         | Female brotherhood ceremonies repertoire         | Absence is coded by 0<br>Presence is coded by 1<br>Missing information is coded by ? |
| 151 | Xylo sur troncs de bananiers | Male brotherhood ceremonies repertoire           | Absence is coded by 0<br>Presence is coded by 1<br>Missing information is coded by ? |
| 152 | Yanga                        | Twins ceremonies repertoire                      | Absence is coded by 0<br>Presence is coded by 1<br>Missing information is coded by ? |
| 153 | Madumajen                    | Entertainment repertoire                         | Absence is coded by 0<br>Presence is coded by 1<br>Missing information is coded by ? |
| 154 | Ikoro                        | Hunt ceremonies repertoire                       | Absence is coded by 0<br>Presence is coded by 1<br>Missing information is coded by ? |
| 155 | Issogha                      | Male brotherhood and twins ceremonies repertoire | Absence is coded by 0<br>Presence is coded by 1<br>Missing information is coded by ? |
| 156 | Mobondjo                     | Entertainment repertoire                         | Absence is coded by 0<br>Presence is coded by 1<br>Missing information is coded by ? |
| 157 | Ndumbwé                      | Male brotherhood ceremonies repertoire           | Absence is coded by 0<br>Presence is coded by 1<br>Missing information is coded by ? |
| 158 | Kodé                         | Entertainment repertoire                         | Absence is coded by 0<br>Presence is coded by 1<br>Missing information is coded by ? |
| 159 | Abobo                        | Entertainment repertoire                         | Absence is coded by 0<br>Presence is coded by 1<br>Missing information is coded by ? |
| 160 | Mukudji                      | Entertainment repertoire                         | Absence is coded by 0<br>Presence is coded by 1<br>Missing information is coded by ? |
| 161 | Ikwara                       | Entertainment repertoire                         | Absence is coded by 0<br>Presence is coded by 1<br>Missing information is coded by ? |
| 162 | Eight strings harp           | Chordophone musical instrument                   | Absence is coded by 0                                                                |

|     |                                               |                                |                                                                                      |
|-----|-----------------------------------------------|--------------------------------|--------------------------------------------------------------------------------------|
|     |                                               |                                | Presence is coded by 1<br>Missing information is coded by ?                          |
| 163 | Pluriarc                                      | Chordophone musical instrument | Absence is coded by 0<br>Presence is coded by 1<br>Missing information is coded by ? |
| 164 | Mouth bow                                     | Chordophone musical instrument | Absence is coded by 0<br>Presence is coded by 1<br>Missing information is coded by ? |
| 165 | Bow with two strings                          | Chordophone musical instrument | Absence is coded by 0<br>Presence is coded by 1<br>Missing information is coded by ? |
| 166 | Harp zither                                   | Chordophone musical instrument | Absence is coded by 0<br>Presence is coded by 1<br>Missing information is coded by ? |
| 167 | Bow with resonator                            | Chordophone musical instrument | Absence is coded by 0<br>Presence is coded by 1<br>Missing information is coded by ? |
| 168 | Horn                                          | Aerophone musical instrument   | Absence is coded by 0<br>Presence is coded by 1<br>Missing information is coded by ? |
| 169 | Whistle                                       | Aerophone musical instrument   | Absence is coded by 0<br>Presence is coded by 1<br>Missing information is coded by ? |
| 170 | Papaya leafstalk whistle                      | Aerophone musical instrument   | Absence is coded by 0<br>Presence is coded by 1<br>Missing information is coded by ? |
| 171 | Bullroarer                                    | Aerophone musical instrument   | Absence is coded by 0<br>Presence is coded by 1<br>Missing information is coded by ? |
| 172 | Whistle earth                                 | Aerophone musical instrument   | Absence is coded by 0<br>Presence is coded by 1<br>Missing information is coded by ? |
| 173 | Calebash horn                                 | Aerophone musical instrument   | Absence is coded by 0<br>Presence is coded by 1<br>Missing information is coded by ? |
| 174 | Fixed key xylophones with multiple calabashes | Idiophone musical instrument   | Absence is coded by 0<br>Presence is coded by 1<br>Missing information is coded by ? |
| 175 | Log xylophones                                | Idiophone musical instrument   | Absence is coded by 0<br>Presence is coded by 1<br>Missing information is coded by ? |
| 176 | Sanza                                         | Idiophone musical instrument   | Absence is coded by 0<br>Presence is coded by 1<br>Missing information is coded by ? |
| 177 | Short sticks banging together                 | Idiophone musical instrument   | Absence is coded by 0<br>Presence is coded by 1<br>Missing information is coded by ? |
| 178 | Long sticks banging together                  | Idiophone musical instrument   | Absence is coded by 0<br>Presence is coded by 1<br>Missing information is coded by ? |
| 179 | Slit drum                                     | Idiophone musical instrument   | Absence is coded by 0<br>Presence is coded by 1                                      |

|     |                                                              |                              |                                                                                      |
|-----|--------------------------------------------------------------|------------------------------|--------------------------------------------------------------------------------------|
|     |                                                              |                              | Missing information is coded by ?                                                    |
| 180 | Wooden bell                                                  | Idiophone musical instrument | Absence is coded by 0<br>Presence is coded by 1<br>Missing information is coded by ? |
| 181 | Wooden bell<br>geminate                                      | Idiophone musical instrument | Absence is coded by 0<br>Presence is coded by 1<br>Missing information is coded by ? |
| 182 | Metal open bell<br>struck with a<br>hammer held.             | Idiophone musical instrument | Absence is coded by 0<br>Presence is coded by 1<br>Missing information is coded by ? |
| 183 | Metal open bells<br>with a suspended<br>crotal for a clapper | Idiophone musical instrument | Absence is coded by 0<br>Presence is coded by 1<br>Missing information is coded by ? |
| 184 | Double metal bell                                            | Idiophone musical instrument | Absence is coded by 0<br>Presence is coded by 1<br>Missing information is coded by ? |
| 185 | Dog bell                                                     | Idiophone musical instrument | Absence is coded by 0<br>Presence is coded by 1<br>Missing information is coded by ? |
| 186 | Hollow-sphere<br>form metal bell                             | Idiophone musical instrument | Absence is coded by 0<br>Presence is coded by 1<br>Missing information is coded by ? |
| 187 | Basket rattle                                                | Idiophone musical instrument | Absence is coded by 0<br>Presence is coded by 1<br>Missing information is coded by ? |
| 188 | Double basket rattle                                         | Idiophone musical instrument | Absence is coded by 0<br>Presence is coded by 1<br>Missing information is coded by ? |
| 189 | Double ball rattle                                           | Idiophone musical instrument | Absence is coded by 0<br>Presence is coded by 1<br>Missing information is coded by ? |
| 190 | Calebash rattle                                              | Idiophone musical instrument | Absence is coded by 0<br>Presence is coded by 1<br>Missing information is coded by ? |
| 191 | Snail shells                                                 | Idiophone musical instrument | Absence is coded by 0<br>Presence is coded by 1<br>Missing information is coded by ? |
| 192 | Seeds suspension<br>rattles                                  | Idiophone musical instrument | Absence is coded by 0<br>Presence is coded by 1<br>Missing information is coded by ? |
| 193 | Bean seeds rattle                                            | Idiophone musical instrument | Absence is coded by 0<br>Presence is coded by 1<br>Missing information is coded by ? |
| 194 | Suspension rattles<br>wheeled to the<br>calves               | Idiophone musical instrument | Absence is coded by 0<br>Presence is coded by 1<br>Missing information is coded by ? |
| 195 | Suspension rattles<br>wheeled around the<br>waist            | Idiophone musical instrument | Absence is coded by 0<br>Presence is coded by 1<br>Missing information is coded by ? |
| 196 | Beam struck                                                  | Idiophone musical instrument | Absence is coded by 0<br>Presence is coded by 1<br>Missing information is coded by ? |
| 197 | Jingles in raffia                                            | Idiophone musical instrument | Absence is coded by 0                                                                |

|     |                                                                  |                                  |                                                                                      |
|-----|------------------------------------------------------------------|----------------------------------|--------------------------------------------------------------------------------------|
|     | skirt                                                            |                                  | Presence is coded by 1<br>Missing information is coded by ?                          |
| 198 | Jingles belt                                                     | Idiophone musical instrument     | Absence is coded by 0<br>Presence is coded by 1<br>Missing information is coded by ? |
| 199 | Bamboo stamping tube                                             | Idiophone musical instrument     | Absence is coded by 0<br>Presence is coded by 1<br>Missing information is coded by ? |
| 200 | Gas bottle                                                       | Idiophone musical instrument     | Absence is coded by 0<br>Presence is coded by 1<br>Missing information is coded by ? |
| 201 | Mirliton                                                         | Membranophone musical instrument | Absence is coded by 0<br>Presence is coded by 1<br>Missing information is coded by ? |
| 202 | Goblet drum with bound skin                                      | Membranophone musical instrument | Absence is coded by 0<br>Presence is coded by 1<br>Missing information is coded by ? |
| 203 | Cylindrical drum with skin nailed                                | Membranophone musical instrument | Absence is coded by 0<br>Presence is coded by 1<br>Missing information is coded by ? |
| 204 | Short cylindrical drum                                           | Membranophone musical instrument | Absence is coded by 0<br>Presence is coded by 1<br>Missing information is coded by ? |
| 205 | Short goblet drum with skin nailed (mokiki)                      | Membranophone musical instrument | Absence is coded by 0<br>Presence is coded by 1<br>Missing information is coded by ? |
| 206 | Conical drum with two laced skins, hand played                   | Membranophone musical instrument | Absence is coded by 0<br>Presence is coded by 1<br>Missing information is coded by ? |
| 207 | Conical drum with two laced skins, one hand and one stick played | Membranophone musical instrument | Absence is coded by 0<br>Presence is coded by 1<br>Missing information is coded by ? |
| 208 | Conical drum with two laced skins, stick played                  | Membranophone musical instrument | Absence is coded by 0<br>Presence is coded by 1<br>Missing information is coded by ? |
| 209 | Conical drum with one laced skin                                 | Membranophone musical instrument | Absence is coded by 0<br>Presence is coded by 1<br>Missing information is coded by ? |
| 210 | Cylindrical drum with one skin pegged                            | Membranophone musical instrument | Absence is coded by 0<br>Presence is coded by 1<br>Missing information is coded by ? |
| 211 | Short cylindrical drum with one skin pegged                      | Membranophone musical instrument | Absence is coded by 0<br>Presence is coded by 1<br>Missing information is coded by ? |
| 212 | Cylindrical drum with one skin laced and pegged                  | Membranophone musical instrument | Absence is coded by 0<br>Presence is coded by 1<br>Missing information is coded by ? |
| 213 | Cylindrical drum with one skin struck by a clump of grass        | Membranophone musical instrument | Absence is coded by 0<br>Presence is coded by 1<br>Missing information is coded by ? |
| 214 | Friction drum                                                    | Membranophone musical instrument | Absence is coded by 0                                                                |

|     |                               |                                                                                     |                                                                                                                                                                                                                                                                                                                                                                                                                                                                                                                                                                                                                                                                                   |
|-----|-------------------------------|-------------------------------------------------------------------------------------|-----------------------------------------------------------------------------------------------------------------------------------------------------------------------------------------------------------------------------------------------------------------------------------------------------------------------------------------------------------------------------------------------------------------------------------------------------------------------------------------------------------------------------------------------------------------------------------------------------------------------------------------------------------------------------------|
|     |                               | instrument                                                                          | Presence is coded by 1<br>Missing information is coded by ?                                                                                                                                                                                                                                                                                                                                                                                                                                                                                                                                                                                                                       |
| 215 | Six strings harp with a base. | Cordophone musical instrument                                                       | Absence is coded by 0<br>Presence is coded by 1<br>Missing information is coded by ?                                                                                                                                                                                                                                                                                                                                                                                                                                                                                                                                                                                              |
| 216 | Iron whistle                  | Aerophone musical instrument                                                        | Absence is coded by 0<br>Presence is coded by 1<br>Missing information is coded by ?                                                                                                                                                                                                                                                                                                                                                                                                                                                                                                                                                                                              |
| 217 | Wood whistle                  | Aerophone musical instrument                                                        | Absence is coded by 0<br>Presence is coded by 1<br>Missing information is coded by ?                                                                                                                                                                                                                                                                                                                                                                                                                                                                                                                                                                                              |
| 218 | Ground bow                    | Cordophone musical instrument                                                       | Absence is coded by 0<br>Presence is coded by 1<br>Missing information is coded by ?                                                                                                                                                                                                                                                                                                                                                                                                                                                                                                                                                                                              |
| 219 | Accordion                     | Aerophone musical instrument                                                        | Absence is coded by 0<br>Presence is coded by 1<br>Missing information is coded by ?                                                                                                                                                                                                                                                                                                                                                                                                                                                                                                                                                                                              |
| 220 | Drumstick stamping            | Idiophone musical instrument                                                        | Absence is coded by 0<br>Presence is coded by 1<br>Missing information is coded by ?                                                                                                                                                                                                                                                                                                                                                                                                                                                                                                                                                                                              |
| 221 | Bamboo whistle (dibeka)       | Aerophone musical instrument                                                        | Absence is coded by 0<br>Presence is coded by 1<br>Missing information is coded by ?                                                                                                                                                                                                                                                                                                                                                                                                                                                                                                                                                                                              |
| 222 | Clashed horns                 | Idiophone musical instrument                                                        | Absence is coded by 0<br>Presence is coded by 1<br>Missing information is coded by ?                                                                                                                                                                                                                                                                                                                                                                                                                                                                                                                                                                                              |
| 223 | Seeds clashed                 | Idiophone musical instrument                                                        | Absence is coded by 0<br>Presence is coded by 1<br>Missing information is coded by ?                                                                                                                                                                                                                                                                                                                                                                                                                                                                                                                                                                                              |
| 224 | Frame drum in chair           | Membranophone musical instrument                                                    | Absence is coded by 0<br>Presence is coded by 1<br>Missing information is coded by ?                                                                                                                                                                                                                                                                                                                                                                                                                                                                                                                                                                                              |
| 225 | 1                             |  | Presence in ngodja repertoire is coded by à<br>Presence in lisimbu repertoire is coded by 1<br>Presence in nzobi repertoire is coded by 2<br>Presence in ngoye repertoire is coded by 5<br>Presence in mungala repertoire is coded by 6<br>Presence in wuya repertoire is coded by 8<br>Absence is coded by 0<br>Missing information is coded by ?                                                                                                                                                                                                                                                                                                                                |
| 226 | 2                             |  | Presence in nzokou repertoire is coded by £<br>Presence in ngodja repertoire is coded by à<br>Presence in bubeyu repertoire is coded by c<br>Presence in bwiti koji repertoire is coded by è<br>Presence in onkila repertoire is coded by h<br>Presence in mavasa repertoire is coded by 1<br>Presence in ibwema repertoire is coded by o<br>Presence in ngi repertoire is coded by ù<br>Presence in mabandji repertoire is coded by x<br>Presence in lisimbu repertoire is coded by 1<br>Presence in nzobi repertoire is coded by 2<br>Presence in ngwata repertoire is coded by 3<br>Presence in ngoye repertoire is coded by 5<br>Presence in mungala repertoire is coded by 6 |

|     |   |                                                                                     |                                                                                                                                                                                                                                                                                                                                                                                                                                                                                                                                                                                                                                                                                                                                                                                                                                                                                                                                                                                                                                                                                                                                                                                               |
|-----|---|-------------------------------------------------------------------------------------|-----------------------------------------------------------------------------------------------------------------------------------------------------------------------------------------------------------------------------------------------------------------------------------------------------------------------------------------------------------------------------------------------------------------------------------------------------------------------------------------------------------------------------------------------------------------------------------------------------------------------------------------------------------------------------------------------------------------------------------------------------------------------------------------------------------------------------------------------------------------------------------------------------------------------------------------------------------------------------------------------------------------------------------------------------------------------------------------------------------------------------------------------------------------------------------------------|
|     |   |                                                                                     | <p>Presence in wuya repertoire is coded by 8</p> <p>Presence in mimbwiri repertoire is coded by 9</p> <p>Absence is coded by 0</p> <p>Missing information is coded by ?</p>                                                                                                                                                                                                                                                                                                                                                                                                                                                                                                                                                                                                                                                                                                                                                                                                                                                                                                                                                                                                                   |
| 227 | 3 |    | <p>Presence in boumba repertoire is coded by \$</p> <p>Presence in nzokou repertoire is coded by £</p> <p>Presence in ologo repertoire is coded by a</p> <p>Presence in ngodja repertoire is coded by à</p> <p>Presence in bubeyu repertoire is coded by c</p> <p>Presence in langu repertoire is coded by ç</p> <p>Presence in bwiti koji repertoire is coded by è</p> <p>Presence in onkila repertoire is coded by h</p> <p>Presence in ngungu tek repertoire is coded by i</p> <p>Presence in mavasa repertoire is coded by l</p> <p>Presence in ibwema repertoire is coded by o</p> <p>Presence in ngi repertoire is coded by ù</p> <p>Presence in mabandji repertoire is coded by x</p> <p>Presence in lisimbu repertoire is coded by 1</p> <p>Presence in nzobi repertoire is coded by 2</p> <p>Presence in ngwata repertoire is coded by 3</p> <p>Presence in ngoye repertoire is coded by 5</p> <p>Presence in mungala repertoire is coded by 6</p> <p>Presence in mopfougou repertoire is coded by 7</p> <p>Presence in wuya repertoire is coded by 8</p> <p>Presence in mimbwiri repertoire is coded by 9</p> <p>Absence is coded by 0</p> <p>Missing information is coded by ?</p> |
| 228 | 4 |  | <p>Presence in boumba repertoire is coded by \$</p> <p>Presence in nzokou repertoire is coded by £</p> <p>Presence in ngodja repertoire is coded by à</p> <p>Presence in bubeyu repertoire is coded by c</p> <p>Presence in deke repertoire is coded by é</p> <p>Presence in bwiti koji repertoire is coded by è</p> <p>Presence in ngungu tek repertoire is coded by i</p> <p>Presence in mavasa repertoire is coded by l</p> <p>Presence in ibwema repertoire is coded by o</p> <p>Presence in lisimbu repertoire is coded by 1</p> <p>Presence in ngoye repertoire is coded by 5</p> <p>Presence in <i>mungala</i> repertoire is coded by 6</p> <p>Presence in <i>wuya</i> repertoire is coded by 8</p> <p>Presence in <i>mimbwiri</i> repertoire is coded by 9</p> <p>Absence is coded by 0</p> <p>Missing information is coded by ?</p>                                                                                                                                                                                                                                                                                                                                                  |
| 229 | 5 |  | <p>Presence in <i>lisimbu</i> repertoire is coded by 1</p> <p>Presence in <i>mungala</i> repertoire is coded by 6</p> <p>Absence is coded by 0</p> <p>Missing information is coded by ?</p>                                                                                                                                                                                                                                                                                                                                                                                                                                                                                                                                                                                                                                                                                                                                                                                                                                                                                                                                                                                                   |
| 230 | 6 |  | <p>Presence in <i>lisimbu</i> repertoire is coded by 1</p> <p>Presence in <i>nzobi</i> repertoire is coded by 2</p> <p>Presence in <i>ngoye</i> repertoire is coded by 5</p> <p>Presence in <i>mungala</i> repertoire is coded by 6</p> <p>Presence in <i>mimbwiri</i> repertoire is coded by 9</p> <p>Presence in <i>ngodja</i> repertoire is coded by à</p> <p>Presence in <i>bubeyu</i> repertoire is coded by c</p>                                                                                                                                                                                                                                                                                                                                                                                                                                                                                                                                                                                                                                                                                                                                                                       |

|     |    |                                                                                     |                                                                                                                                                                                                                                                                                                                                                                                                                                                                                                                                                                                                                                                                                                                                                                                                  |
|-----|----|-------------------------------------------------------------------------------------|--------------------------------------------------------------------------------------------------------------------------------------------------------------------------------------------------------------------------------------------------------------------------------------------------------------------------------------------------------------------------------------------------------------------------------------------------------------------------------------------------------------------------------------------------------------------------------------------------------------------------------------------------------------------------------------------------------------------------------------------------------------------------------------------------|
|     |    |                                                                                     | <p>Presence in <i>mavasa</i> repertoire is coded by 1</p> <p>Absence is coded by 0</p> <p>Missing information is coded by ?</p>                                                                                                                                                                                                                                                                                                                                                                                                                                                                                                                                                                                                                                                                  |
| 231 | 7  |    | <p>Presence in <i>bubeyu</i> repertoire is coded by c</p> <p>Presence in <i>lisimbu</i> repertoire is coded by 1</p> <p>Presence in <i>mungala</i> repertoire is coded by 6</p> <p>Presence in <i>mimbwiri</i> repertoire is coded by 9</p> <p>Absence is coded by 0</p> <p>Missing information is coded by ?</p>                                                                                                                                                                                                                                                                                                                                                                                                                                                                                |
| 232 | 8  |    | <p>Presence in <i>bubeyu</i> repertoire is coded by c</p> <p>Presence in <i>lisimbu</i> repertoire is coded by 1</p> <p>Presence in <i>mungala</i> repertoire is coded by 6</p> <p>Absence is coded by 0</p> <p>Missing information is coded by ?</p>                                                                                                                                                                                                                                                                                                                                                                                                                                                                                                                                            |
| 233 | 9  |    | <p>Presence in <i>bubeyu</i> repertoire is coded by c</p> <p>Presence in <i>ngi</i> repertoire is coded by ù</p> <p>Presence in <i>lisimbu</i> repertoire is coded by 1</p> <p>Presence in <i>mungala</i> repertoire is coded by 6</p> <p>Absence is coded by 0</p> <p>Missing information is coded by ?</p>                                                                                                                                                                                                                                                                                                                                                                                                                                                                                     |
| 234 | 10 |    | <p>Presence in <i>boumba</i> repertoire is coded by \$</p> <p>Presence in <i>nzokou</i> repertoire is coded by £</p> <p>Presence in <i>ologo</i> repertoire is coded by a</p> <p>Presence in <i>ngodja</i> repertoire is coded by à</p> <p>Presence in <i>bubeyu</i> repertoire is coded by c</p> <p>Presence in <i>ibwema</i> repertoire is coded by o</p> <p>Presence in <i>mabandji</i> repertoire is coded by x</p> <p>Presence in <i>lisimbu</i> repertoire is coded by 1</p> <p>Presence in <i>ngoye</i> repertoire is coded by 5</p> <p>Presence in <i>mungala</i> repertoire is coded by 6</p> <p>Presence in <i>wuya</i> repertoire is coded by 8</p> <p>Presence in <i>mimbwiri</i> repertoire is coded by 9</p> <p>Absence is coded by 0</p> <p>Missing information is coded by ?</p> |
| 235 | 11 |  | <p>Presence in <i>bubeyu</i> repertoire is coded by c</p> <p>Presence in <i>lisimbu</i> repertoire is coded by 1</p> <p>Presence in <i>mungala</i> repertoire is coded by 6</p> <p>Absence is coded by 0</p> <p>Missing information is coded by ?</p>                                                                                                                                                                                                                                                                                                                                                                                                                                                                                                                                            |
| 236 | 12 |  | <p>Presence in <i>bwiti koji</i> repertoire is coded by è</p> <p>Presence in <i>mavasa</i> repertoire is coded by 1</p> <p>Presence in <i>ibwema</i> repertoire is coded by o</p> <p>Presence in <i>lisimbu</i> repertoire is coded by 1</p> <p>Absence is coded by 0</p> <p>Missing information is coded by ?</p>                                                                                                                                                                                                                                                                                                                                                                                                                                                                               |
| 237 | 13 |  | <p>Presence in <i>mwiri</i> repertoire is coded by p</p> <p>Presence in <i>mavasa</i> repertoire is coded by 1</p> <p>Presence in <i>ngoye</i> repertoire is coded by 5</p> <p>Absence is coded by 0</p> <p>Missing information is coded by ?</p>                                                                                                                                                                                                                                                                                                                                                                                                                                                                                                                                                |
| 238 | 14 |  | <p>Presence in <i>ngoye</i> repertoire is coded by 5</p> <p>Presence in <i>mimbwiri</i> repertoire is coded by 9</p> <p>Absence is coded by 0</p> <p>Missing information is coded by ?</p>                                                                                                                                                                                                                                                                                                                                                                                                                                                                                                                                                                                                       |

|     |    |                                                                                     |                                                                                                                                                                                                                                                                                                                                                                                                                                                                                                                                                                                                                                                                                                                                                                                             |
|-----|----|-------------------------------------------------------------------------------------|---------------------------------------------------------------------------------------------------------------------------------------------------------------------------------------------------------------------------------------------------------------------------------------------------------------------------------------------------------------------------------------------------------------------------------------------------------------------------------------------------------------------------------------------------------------------------------------------------------------------------------------------------------------------------------------------------------------------------------------------------------------------------------------------|
| 239 | 15 |    | bsence is coded by 0<br>Missing information is coded by ?                                                                                                                                                                                                                                                                                                                                                                                                                                                                                                                                                                                                                                                                                                                                   |
| 240 | 16 |    | Presence in <i>lisimbu</i> repertoire is coded by 1<br>Absence is coded by 0<br>Missing information is coded by ?                                                                                                                                                                                                                                                                                                                                                                                                                                                                                                                                                                                                                                                                           |
| 241 | 17 |    | Presence in <i>lisimbu</i> repertoire is coded by 1<br>Presence in <i>nzobi</i> repertoire is coded by 2<br>Presence in <i>mimbwiri</i> repertoire is coded by 9<br>Absence is coded by 0<br>Missing information is coded by ?                                                                                                                                                                                                                                                                                                                                                                                                                                                                                                                                                              |
| 242 | 18 |    | Presence in <i>lisimbu</i> repertoire is coded by 1<br>Presence in <i>ngoye</i> repertoire is coded by 5<br>Absence is coded by 0<br>Missing information is coded by ?                                                                                                                                                                                                                                                                                                                                                                                                                                                                                                                                                                                                                      |
| 243 | 19 |    | Presence in <i>boumba</i> repertoire is coded by \$<br>Presence in <i>ngodja</i> repertoire is coded by à<br>Presence in <i>langu</i> repertoire is coded by ç<br>Presence in <i>deke</i> repertoire is coded by é<br>Presence in <i>bwiti koji</i> repertoire is coded by è<br>Presence in <i>ngungu tek</i> repertoire is coded by i<br>Presence in <i>mavasa</i> repertoire is coded by l<br>Presence in <i>ngi</i> repertoire is coded by ù<br>Presence in <i>lisimbu</i> repertoire is coded by 1<br>Presence in <i>nzobi</i> repertoire is coded by 2<br>Presence in <i>ngwata</i> repertoire is coded by 3<br>Presence in <i>ngoye</i> repertoire is coded by 5<br>Presence in <i>mungala</i> repertoire is coded by 6<br>Absence is coded by 0<br>Missing information is coded by ? |
| 244 | 20 |  | Presence in <i>nzobi</i> repertoire is coded by 2<br>Absence is coded by 0<br>Missing information is coded by ?                                                                                                                                                                                                                                                                                                                                                                                                                                                                                                                                                                                                                                                                             |
| 245 | 21 |  | Presence in <i>bwiti koji</i> repertoire is coded by è<br>Presence in <i>nzobi</i> repertoire is coded by 2<br>Presence in <i>ngoye</i> repertoire is coded by 5<br>Presence in <i>mungala</i> repertoire is coded by 6<br>Presence in <i>mopfougou</i> repertoire is coded by 7<br>Absence is coded by 0<br>Missing information is coded by ?                                                                                                                                                                                                                                                                                                                                                                                                                                              |
| 246 | 22 |  | Presence in <i>bubeyu</i> repertoire is coded by c<br>Presence in <i>lisimbu</i> repertoire is coded by 1<br>Presence in <i>mungala</i> repertoire is coded by 6<br>Absence is coded by 0<br>Missing information is coded by ?                                                                                                                                                                                                                                                                                                                                                                                                                                                                                                                                                              |
| 247 | 23 |  | Presence in <i>boumba</i> repertoire is coded by \$<br>Presence in <i>nzokou</i> repertoire is coded by £<br>Presence in <i>bubeyu</i> repertoire is coded by c<br>Presence in <i>ibwema</i> repertoire is coded by o<br>Presence in <i>lisimbu</i> repertoire is coded by 1<br>Presence in <i>mungala</i> repertoire is coded by 6<br>Presence in <i>wuya</i> repertoire is coded by 8<br>Absence is coded by 0<br>Missing information is coded by ?                                                                                                                                                                                                                                                                                                                                       |



|     |    |                                                                                     |                                                                                                                                                                                                                                                                                                                                                                                                                                                                                                                                                                                                                                                                                   |
|-----|----|-------------------------------------------------------------------------------------|-----------------------------------------------------------------------------------------------------------------------------------------------------------------------------------------------------------------------------------------------------------------------------------------------------------------------------------------------------------------------------------------------------------------------------------------------------------------------------------------------------------------------------------------------------------------------------------------------------------------------------------------------------------------------------------|
| 248 | 24 |    | Presence in <i>mungala</i> repertoire is coded by 6<br>Absence is coded by 0<br>Missing information is coded by ?                                                                                                                                                                                                                                                                                                                                                                                                                                                                                                                                                                 |
| 249 | 25 |    | Presence in <i>onkila</i> repertoire is coded by h<br>Presence in <i>mbudi</i> repertoire is coded by l<br>Presence in <i>ibwema</i> repertoire is coded by o<br>Presence in <i>mwiri</i> repertoire is coded by p<br>Presence in <i>lisimbu</i> repertoire is coded by 1<br>Presence in <i>nzobi</i> repertoire is coded by 2<br>Presence in <i>ngwata</i> repertoire is coded by 3<br>Presence in <i>ngoye</i> repertoire is coded by 5<br>Presence in <i>mungala</i> repertoire is coded by 6<br>Presence in <i>mopfougou</i> repertoire is coded by 7<br>Presence in <i>wuya</i> repertoire is coded by 8<br>Absence is coded by 0<br>Missing information is coded by ?       |
| 250 | 26 |    | Presence in <i>nzobi</i> repertoire is coded by 2<br>0 Absence is coded by 0<br>Missing information is coded by ?                                                                                                                                                                                                                                                                                                                                                                                                                                                                                                                                                                 |
| 251 | 27 |    | Presence in <i>deke</i> repertoire is coded by é<br>Presence in <i>bwiti koji</i> repertoire is coded by è<br>Presence in <i>lisimbu</i> repertoire is coded by 1<br>Presence in <i>ngoye</i> repertoire is coded by 5<br>Absence is coded by 0<br>Missing information is coded by ?                                                                                                                                                                                                                                                                                                                                                                                              |
| 252 | 28 |  | Presence in <i>lisimbu</i> repertoire is coded by 1<br>Absence is coded by 0<br>Missing information is coded by ?                                                                                                                                                                                                                                                                                                                                                                                                                                                                                                                                                                 |
| 253 | 29 |  | Presence in <i>mungala</i> repertoire is coded by 6<br>Absence is coded by 0<br>Missing information is coded by ?                                                                                                                                                                                                                                                                                                                                                                                                                                                                                                                                                                 |
| 254 | 30 |  | Presence in <i>ologo</i> repertoire is coded by a<br>Presence in <i>mbudi</i> repertoire is coded by f<br>Presence in <i>olamagha</i> repertoire is coded by j<br>Presence in <i>kenge</i> repertoire is coded by n<br>Presence in <i>makouma</i> repertoire is coded by s<br>Presence in <i>mundukwe</i> repertoire is coded by t<br>Presence in <i>kunde</i> repertoire is coded by v<br>Presence in <i>mabundi</i> repertoire is coded by w<br>Presence in <i>minonze</i> repertoire is coded by y<br>Presence in <i>lisimbu</i> repertoire is coded by 1<br>Presence in <i>mungala</i> repertoire is coded by 6<br>Absence is coded by 0<br>Missing information is coded by ? |
| 255 | 31 |  | Presence in <i>bwiti missoko</i> repertoire is coded by *<br><br>Presence in <i>nyembe</i> repertoire is coded by #<br>Presence in <i>ologo</i> repertoire is coded by a<br>Presence in <i>mbumba</i> repertoire is coded by b<br>Presence in <i>mbudi</i> repertoire is coded by f<br>Presence in <i>issogha</i> repertoire is coded by g<br>Presence in <i>abire nkele</i> repertoire is coded by k<br>Presence in <i>mujaja</i> repertoire is coded by m<br>Presence in <i>makouma</i> repertoire is coded by s                                                                                                                                                                |

|     |    |                                                                                     |                                                                                                                                                                                                                                                                                                                                                                                                                                                                                                                                                                                                                                                                                                                                                                                                                                                                                                                                                                                                                                                          |
|-----|----|-------------------------------------------------------------------------------------|----------------------------------------------------------------------------------------------------------------------------------------------------------------------------------------------------------------------------------------------------------------------------------------------------------------------------------------------------------------------------------------------------------------------------------------------------------------------------------------------------------------------------------------------------------------------------------------------------------------------------------------------------------------------------------------------------------------------------------------------------------------------------------------------------------------------------------------------------------------------------------------------------------------------------------------------------------------------------------------------------------------------------------------------------------|
|     |    |                                                                                     | <p>Presence in <i>mundukwe</i> repertoire is coded by t</p> <p>Presence in <i>kore</i> repertoire is coded by u</p> <p>Presence in <i>kunde</i> repertoire is coded by v</p> <p>Presence in <i>mabundi</i> repertoire is coded by w</p> <p>Presence in <i>mabandji</i> repertoire is coded by x</p> <p>Presence in <i>minonze</i> repertoire is coded by y</p> <p>Presence in <i>bwiti disumba</i> repertoire is coded by z</p> <p>Presence in <i>lisimbu</i> repertoire is coded by 1</p> <p>Presence in <i>ngwata</i> repertoire is coded by 3</p> <p>Presence in <i>mungala</i> repertoire is coded by 6</p> <p>Presence in <i>mimbwiri</i> repertoire is coded by 9</p> <p>Absence is coded by 0</p> <p>Missing information is coded by ?</p>                                                                                                                                                                                                                                                                                                        |
| 256 | 32 |    | <p>Presence in <i>bwiti missoko</i> repertoire is coded by *</p> <p>Presence in <i>nyembe</i> repertoire is coded by #</p> <p>Presence in <i>mbumba</i> repertoire is coded by b</p> <p>Presence in <i>djangu</i> repertoire is coded by r</p> <p>Presence in <i>mabundi</i> repertoire is coded by w</p> <p>Presence in <i>minonze</i> repertoire is coded by y</p> <p>Absence is coded by 0</p> <p>Missing information is coded by ?</p>                                                                                                                                                                                                                                                                                                                                                                                                                                                                                                                                                                                                               |
| 257 | 33 |   | <p>Presence in <i>bwiti missoko</i> repertoire is coded by *</p> <p>Presence in <i>nyembe</i> repertoire is coded by #</p> <p>Presence in <i>mbumba</i> repertoire is coded by b</p> <p>Presence in <i>issogha</i> repertoire is coded by g</p> <p>Presence in <i>olamagha</i> repertoire is coded by j</p> <p>Presence in <i>kenge</i> repertoire is coded by n</p> <p>Presence in <i>mujisi</i> repertoire is coded by q</p> <p>Presence in <i>djangu</i> repertoire is coded by r</p> <p>Presence in <i>makouma</i> repertoire is coded by s</p> <p>Presence in <i>mundukwe</i> repertoire is coded by t</p> <p>Presence in <i>kore</i> repertoire is coded by u</p> <p>Presence in <i>mabundi</i> repertoire is coded by w</p> <p>Presence in <i>minonze</i> repertoire is coded by y</p> <p>Presence in <i>bwiti disumba</i> repertoire is coded by z</p> <p>Presence in <i>ngoye</i> repertoire is coded by 5</p> <p>Presence in <i>mungala</i> repertoire is coded by 6</p> <p>Absence is coded by 0</p> <p>Missing information is coded by ?</p> |
| 258 | 34 |  | <p>Presence in <i>bwiti missoko</i> repertoire is coded by *</p> <p>Presence in <i>nyembe</i> repertoire is coded by #</p> <p>Presence in <i>mbumba</i> repertoire is coded by b</p> <p>Presence in <i>doka</i> repertoire is coded by d</p> <p>Presence in <i>mbadi</i> repertoire is coded by e</p> <p>Presence in <i>mbudi</i> repertoire is coded by f</p> <p>Presence in <i>olamagha</i> repertoire is coded by j</p> <p>Presence in <i>mujaja</i> repertoire is coded by m</p> <p>Presence in <i>kenge</i> repertoire is coded by n</p> <p>Presence in <i>makouma</i> repertoire is coded by s</p>                                                                                                                                                                                                                                                                                                                                                                                                                                                 |

|     |    |                                                                                     |                                                                                                                                                                                                                                                                                                                                                                                                                                                                                                                                                                                                                                                                          |
|-----|----|-------------------------------------------------------------------------------------|--------------------------------------------------------------------------------------------------------------------------------------------------------------------------------------------------------------------------------------------------------------------------------------------------------------------------------------------------------------------------------------------------------------------------------------------------------------------------------------------------------------------------------------------------------------------------------------------------------------------------------------------------------------------------|
|     |    |                                                                                     | Presence in <i>mabundi</i> repertoire is coded by w<br>Presence in <i>minonze</i> repertoire is coded by y<br>Presence in <i>bwiti disumba</i> repertoire is coded by z<br>Presence in <i>lisimbu</i> repertoire is coded by 1<br>Presence in <i>ngwata</i> repertoire is coded by 3<br>Presence in <i>laka</i> repertoire is coded by 4<br>Presence in <i>ngoye</i> repertoire is coded by 5<br>Presence in <i>mungala</i> repertoire is coded by 6<br>Absence is coded by 0<br>Missing information is coded by ?                                                                                                                                                       |
| 259 | 35 |    | Presence in <i>mundukwe</i> repertoire is coded by t<br>Presence in <i>ngoye</i> repertoire is coded by 5<br>Absence is coded by 0<br>Missing information is coded by ?                                                                                                                                                                                                                                                                                                                                                                                                                                                                                                  |
| 260 | 36 |    | Presence in <i>ologo</i> repertoire is coded by a<br>Presence in <i>ngwata</i> repertoire is coded by 3<br>Absence is coded by 0<br>Missing information is coded by ?                                                                                                                                                                                                                                                                                                                                                                                                                                                                                                    |
| 261 | 37 |    | Presence in <i>ngoye</i> repertoire is coded by 5<br>Absence is coded by 0<br>Missing information is coded by ?                                                                                                                                                                                                                                                                                                                                                                                                                                                                                                                                                          |
| 262 | 38 |   | Presence in <i>kore</i> repertoire is coded by u<br>Presence in <i>mungala</i> repertoire is coded by 6<br>Absence is coded by 0<br>Missing information is coded by ?                                                                                                                                                                                                                                                                                                                                                                                                                                                                                                    |
| 263 | 41 |  | Presence in <i>laka</i> repertoire is coded by 4<br>Absence is coded by 0<br>Missing information is coded by ?                                                                                                                                                                                                                                                                                                                                                                                                                                                                                                                                                           |
| 264 | 42 |  | Presence in <i>laka</i> repertoire is coded by 4<br>Absence is coded by 0<br>Missing information is coded by ?                                                                                                                                                                                                                                                                                                                                                                                                                                                                                                                                                           |
| 265 | 43 |  | Presence in <i>makouma</i> repertoire is coded by s<br>Presence in <i>ngoye</i> repertoire is coded by 5<br>Absence is coded by 0<br>Missing information is coded by ?                                                                                                                                                                                                                                                                                                                                                                                                                                                                                                   |
| 266 | 44 |  | Presence in <i>laka</i> repertoire is coded by 4<br>Absence is coded by 0<br>Missing information is coded by ?                                                                                                                                                                                                                                                                                                                                                                                                                                                                                                                                                           |
| 267 | 45 |  | Presence in <i>laka</i> repertoire is coded by 4<br>Absence is coded by 0<br>Missing information is coded by ?                                                                                                                                                                                                                                                                                                                                                                                                                                                                                                                                                           |
| 268 | 46 |  | Presence in <i>ologo</i> repertoire is coded by a<br>Presence in <i>mbumba</i> repertoire is coded by b<br>Presence in <i>doka</i> repertoire is coded by d<br>Presence in <i>mbadi</i> repertoire is coded by e<br>Presence in <i>mbudi</i> repertoire is coded by f<br>Presence in <i>issogha</i> repertoire is coded by g<br>Presence in <i>abire nkele</i> repertoire is coded by k<br>Presence in <i>mujaja</i> repertoire is coded by m<br>Presence in <i>kenge</i> repertoire is coded by n<br>Presence in <i>dijangu</i> repertoire is coded by r<br>Presence in <i>makouma</i> repertoire is coded by s<br>Presence in <i>mundukwe</i> repertoire is coded by t |

|     |    |                                                                                     |                                                                                                                                                                                                                                                                                                                                                                                                                                                                                                                                                                                 |
|-----|----|-------------------------------------------------------------------------------------|---------------------------------------------------------------------------------------------------------------------------------------------------------------------------------------------------------------------------------------------------------------------------------------------------------------------------------------------------------------------------------------------------------------------------------------------------------------------------------------------------------------------------------------------------------------------------------|
|     |    |                                                                                     | Presence in <i>kunde</i> repertoire is coded by v<br>Presence in <i>minonze</i> repertoire is coded by y<br>Presence in <i>bwiti disumba</i> repertoire is coded by z<br>Presence in <i>lisimbu</i> repertoire is coded by 1<br>Presence in <i>mungala</i> repertoire is coded by 6<br>Absence is coded by 0<br>Missing information is coded by ?                                                                                                                                                                                                                               |
| 269 | 47 |    | Presence in <i>bwiti missoko</i> repertoire is coded by *<br>Presence in <i>nyembe</i> repertoire is coded by #<br>Presence in <i>mbumba</i> repertoire is coded by b<br>Presence in <i>minonze</i> repertoire is coded by y<br>Presence in <i>mungala</i> repertoire is coded by 6<br>Absence is coded by 0<br>Missing information is coded by ?                                                                                                                                                                                                                               |
| 270 | 48 |    | Presence in <i>bwiti missoko</i> repertoire is coded by *<br>Presence in <i>nyembe</i> repertoire is coded by #<br>Presence in <i>mbumba</i> repertoire is coded by b<br>Presence in <i>mbudi</i> repertoire is coded by f<br>Presence in <i>makouma</i> repertoire is coded by s<br>Presence in <i>mundukwe</i> repertoire is coded by t<br>Presence in <i>kore</i> repertoire is coded by u<br>Presence in <i>bwiti disumba</i> repertoire is coded by z<br>Presence in <i>mungala</i> repertoire is coded by 6<br>Absence is coded by 0<br>Missing information is coded by ? |
| 271 | 49 |  | Presence in <i>mbudi</i> repertoire is coded by f<br>Absence is coded by 0<br>Missing information is coded by ?                                                                                                                                                                                                                                                                                                                                                                                                                                                                 |
| 272 | 50 |  | Presence in <i>abire nkele</i> repertoire is coded by k<br>Presence in <i>mundukwe</i> repertoire is coded by t<br>Presence in <i>kore</i> repertoire is coded by u<br>Presence in <i>mabandji</i> repertoire is coded by x<br>Presence in <i>minonze</i> repertoire is coded by y<br>Presence in <i>lisimbu</i> repertoire is coded by 1<br>Presence in <i>mungala</i> repertoire is coded by 6<br>Presence in <i>mimbwiri</i> repertoire is coded by 9<br>Absence is coded by 0<br>Missing information is coded by ?                                                          |
| 273 | 51 |  | Presence in <i>mungala</i> repertoire is coded by 6<br>Absence is coded by 0<br>Missing information is coded by ?                                                                                                                                                                                                                                                                                                                                                                                                                                                               |
| 274 | 52 |  | Presence in <i>mungala</i> repertoire is coded by 6<br>Absence is coded by 0<br>Missing information is coded by ?                                                                                                                                                                                                                                                                                                                                                                                                                                                               |
| 275 | 53 |  | Presence in <i>mungala</i> repertoire is coded by 6<br>Absence is coded by 0<br>Missing information is coded by ?                                                                                                                                                                                                                                                                                                                                                                                                                                                               |
| 276 | 54 |  | Presence in <i>dijangu</i> repertoire is coded by r<br>Presence in <i>makouma</i> repertoire is coded by s<br>Presence in <i>mundukwe</i> repertoire is coded by t                                                                                                                                                                                                                                                                                                                                                                                                              |

|     |      |                                                                                     |                                                                                                                                                                                                                                                                                     |
|-----|------|-------------------------------------------------------------------------------------|-------------------------------------------------------------------------------------------------------------------------------------------------------------------------------------------------------------------------------------------------------------------------------------|
|     |      |                                                                                     | Presence in <i>kore</i> repertoire is coded by u<br>Presence in <i>mimbwiri</i> repertoire is coded by 9<br>Absence is coded by 0<br>Missing information is coded by ?                                                                                                              |
| 277 | 55   |    | Presence in <i>mbumba</i> repertoire is coded by b<br>Presence in <i>mabandji</i> repertoire is coded by x<br>Absence is coded by 0<br>Missing information is coded by ?                                                                                                            |
| 278 | 56   |    | Presence in <i>mimbwiri</i> repertoire is coded by 9<br>Absence is coded by 0<br>Missing information is coded by ?                                                                                                                                                                  |
| 279 | 60   |    | Presence in <i>bubeyu</i> repertoire is coded by c<br>Absence is coded by 0<br>Missing information is coded by ?                                                                                                                                                                    |
| 280 | 61   |    | Presence in <i>bubeyu</i> repertoire is coded by c<br>Absence is coded by 0<br>Missing information is coded by ?                                                                                                                                                                    |
| 281 | 62   |    | Presence in <i>ngoye</i> repertoire is coded by 5<br>Absence is coded by 0<br>Missing information is coded by ?                                                                                                                                                                     |
| 282 | 63   |    | Presence in <i>mwiri</i> repertoire is coded by p<br>Presence in <i>ngi</i> repertoire is coded by ù<br>Presence in <i>nzobi</i> repertoire is coded by 2<br>Absence is coded by 0<br>Missing information is coded by ?                                                             |
| 283 | 64   |  | Presence in <i>nzobi</i> repertoire is coded by 2<br>Absence is coded by 0<br>Missing information is coded by ?                                                                                                                                                                     |
| 284 | 65   |  | Presence in <i>bubeyu</i> repertoire is coded by c<br>Presence in <i>lisimbu</i> repertoire is coded by 1<br>Absence is coded by 0<br>Missing information is coded by ?                                                                                                             |
| 285 | 66   |  | Presence in <i>lisimbu</i> repertoire is coded by 1<br>Absence is coded by 0<br>Missing information is coded by ?                                                                                                                                                                   |
| 286 | 67   |  | Presence in <i>mungala</i> repertoire is coded by 6<br>Absence is coded by 0<br>Missing information is coded by ?                                                                                                                                                                   |
| 287 | 68   |  | Presence in <i>lisimbu</i> repertoire is coded by 1<br>Absence is coded by 0<br>Missing information is coded by ?                                                                                                                                                                   |
| 288 | 69   |  | Presence in <i>ngodja</i> repertoire is coded by à<br>Absence is coded by 0<br>Missing information is coded by ?                                                                                                                                                                    |
| 289 | 4bi  | Four pulsations cycle. Binary pulsation subdivision                                 | Presence in <i>kenge</i> repertoire is coded by n<br>Presence in <i>makouma</i> repertoire is coded by s<br>Presence in <i>ngwata</i> repertoire is coded by 3<br>Presence in <i>mungala</i> repertoire is coded by 6<br>Absence is coded by 0<br>Missing information is coded by ? |
| 290 | 4ter | Four pulsations cycle. Ternary pulsation subdivision                                | Presence in <i>berceuse</i> repertoire is coded by •<br>Presence in <i>mwiri</i> repertoire is coded by p<br>Absence is coded by 0<br>Missing information is coded by ?                                                                                                             |

|     |      |                                                       |                                                                                                                                                                                                                                                                                                                                                                                                                                                                                                                                                                                                                                                                                                                                                                                                                                                                                                                                                                                                                          |
|-----|------|-------------------------------------------------------|--------------------------------------------------------------------------------------------------------------------------------------------------------------------------------------------------------------------------------------------------------------------------------------------------------------------------------------------------------------------------------------------------------------------------------------------------------------------------------------------------------------------------------------------------------------------------------------------------------------------------------------------------------------------------------------------------------------------------------------------------------------------------------------------------------------------------------------------------------------------------------------------------------------------------------------------------------------------------------------------------------------------------|
| 291 | 6bi  | Six pulsations cycle. Binary pulsation subdivision    | Presence in <i>olamagha</i> repertoire is coded by j<br>Presence in <i>abire nkele</i> repertoire is coded by k<br>Presence in <i>ngoye</i> repertoire is coded by 5<br>Absence is coded by 0<br>Missing information is coded by ?                                                                                                                                                                                                                                                                                                                                                                                                                                                                                                                                                                                                                                                                                                                                                                                       |
| 292 | 6ter | Six pulsations cycle. Ternary pulsation subdivision   | Presence in <i>nzobi</i> repertoire is coded by 2<br>Presence in <i>mungala</i> repertoire is coded by 6<br>Absence is coded by 0<br>Missing information is coded by ?                                                                                                                                                                                                                                                                                                                                                                                                                                                                                                                                                                                                                                                                                                                                                                                                                                                   |
| 293 | 8bi  | Eight pulsations cycle. Binary pulsation subdivision  | Presence in <i>nyembe</i> repertoire is coded by #<br>Presence in <i>berceuse</i> repertoire is coded by •<br>Presence in <i>ologo</i> repertoire is coded by a<br>Presence in <i>mbumba</i> repertoire is coded by b<br>Presence in <i>doka</i> repertoire is coded by d<br>Presence in <i>mbadi</i> repertoire is coded by e<br>Presence in <i>dijangu</i> repertoire is coded by r<br>Presence in <i>makouma</i> repertoire is coded by s<br>Presence in <i>mundukwe</i> repertoire is coded by t<br>Presence in <i>kunde</i> repertoire is coded by v<br>Presence in <i>laka</i> repertoire is coded by 4<br>Presence in <i>ngoye</i> repertoire is coded by 5<br>Presence in <i>mimbwiri</i> repertoire is coded by 9<br>Absence is coded by 0<br>Missing information is coded by ?                                                                                                                                                                                                                                 |
| 294 | 8ter | Eight pulsations cycle. Ternary pulsation subdivision | Presence in <i>berceuse</i> repertoire is coded by •<br>Presence in <i>ologo</i> repertoire is coded by a<br>Presence in <i>ngodja</i> repertoire is coded by à<br>Presence in <i>bubeyu</i> repertoire is coded by c<br>Presence in <i>langu</i> repertoire is coded by ç<br>Presence in <i>onkila</i> repertoire is coded by h<br>Presence in <i>ngungu tek</i> repertoire is coded by i<br>Presence in <i>abire nkele</i> repertoire is coded by k<br>Presence in <i>mavasa</i> repertoire is coded by l<br>Presence in <i>ibwema</i> repertoire is coded by o<br>Presence in <i>mujisi</i> repertoire is coded by q<br>Presence in <i>ngi</i> repertoire is coded by ù<br>Presence in <i>lisimbu</i> repertoire is coded by 1<br>Presence in <i>nzobi</i> repertoire is coded by 2<br>Presence in <i>ngoye</i> repertoire is coded by 5<br>Presence in <i>mungala</i> repertoire is coded by 6<br>Presence in <i>mimbwiri</i> repertoire is coded by 9<br>Absence is coded by 0<br>Missing information is coded by ? |
| 295 | 12bi | Twelve pulsations cycle. Binary pulsation subdivision | Presence in <i>berceuse</i> repertoire is coded by •<br>Presence in <i>mbumba</i> repertoire is coded by b<br>Presence in <i>mbudi</i> repertoire is coded by f<br>Presence in <i>mundukwe</i> repertoire is coded by t<br>Presence in <i>mabandji</i> repertoire is coded by x<br>Presence in <i>minonze</i> repertoire is coded by y<br>Presence in <i>bwiti disumba</i> repertoire is coded by z<br>Presence in <i>lisimbu</i> repertoire is coded by 1<br>Presence in <i>laka</i> repertoire is coded by 4<br>Presence in <i>mungala</i> repertoire is coded by 6                                                                                                                                                                                                                                                                                                                                                                                                                                                    |

|     |            |                                                             |                                                                                                                                                                                                                                                                                                                                                                                                                                                                                                                                                                                                                                                                                                                                                                                                                                                  |
|-----|------------|-------------------------------------------------------------|--------------------------------------------------------------------------------------------------------------------------------------------------------------------------------------------------------------------------------------------------------------------------------------------------------------------------------------------------------------------------------------------------------------------------------------------------------------------------------------------------------------------------------------------------------------------------------------------------------------------------------------------------------------------------------------------------------------------------------------------------------------------------------------------------------------------------------------------------|
|     |            |                                                             | Absence is coded by 0<br>Missing information is coded by ?                                                                                                                                                                                                                                                                                                                                                                                                                                                                                                                                                                                                                                                                                                                                                                                       |
| 296 | 12ter      | Twelve pulsations cycle. Ternary pulsation subdivision      | Presence in <i>boumba</i> repertoire is coded by \$<br>Presence in <i>ngodja</i> repertoire is coded by à<br>Presence in <i>mavasa</i> repertoire is coded by 1<br>Presence in <i>lisimbu</i> repertoire is coded by 1<br>Presence in <i>nzobi</i> repertoire is coded by 2<br>Presence in <i>mungala</i> repertoire is coded by 6<br>Presence in <i>mopfougou</i> repertoire is coded by 7<br>Presence in <i>wuya</i> repertoire is coded by 8<br>Absence is coded by 0<br>Missing information is coded by ?                                                                                                                                                                                                                                                                                                                                    |
| 297 | 16bi       | Sixteen pulsations cycle. Binary pulsation subdivision      | Presence in <i>bwiti misoko</i> repertoire is coded by *<br>Presence in <i>nyembe</i> repertoire is coded by #<br>Presence in <i>ologo</i> repertoire is coded by a<br>Presence in <i>mbadi</i> repertoire is coded by e<br>Presence in <i>mbudi</i> repertoire is coded by f<br>Presence in <i>issogha</i> repertoire is coded by g<br>Presence in <i>mujaja</i> repertoire is coded by m<br>Presence in <i>mujisi</i> repertoire is coded by q<br>Presence in <i>makouma</i> repertoire is coded by s<br>Presence in <i>kore</i> repertoire is coded by u<br>Presence in <i>kunde</i> repertoire is coded by v<br>Presence in <i>maboundi</i> repertoire is coded by w<br>Presence in <i>ngwata</i> repertoire is coded by 3<br>Presence in <i>laka</i> repertoire is coded by 4<br>Absence is coded by 0<br>Missing information is coded by ? |
| 298 | 16ter      | Sixteen pulsations cycle. Ternary pulsation subdivision     | Presence in <i>berceuse</i> repertoire is coded by •<br>Presence in <i>boumba</i> repertoire is coded by \$<br>Presence in <i>bubeyu</i> repertoire is coded by c<br>Presence in <i>deke</i> repertoire is coded by é<br>Presence in <i>bwiti koji</i> repertoire is coded by è<br>Presence in <i>mavasa</i> repertoire is coded by 1<br>Presence in <i>ibwema</i> repertoire is coded by o<br>Presence in <i>ngi</i> repertoire is coded by ù<br>Presence in <i>lisimbu</i> repertoire is coded by 1<br>Presence in <i>nzobi</i> repertoire is coded by 2<br>Presence in <i>mungala</i> repertoire is coded by 6<br>Absence is coded by 0<br>Missing information is coded by ?                                                                                                                                                                  |
| 299 | 18ter      | Eighteen pulsations cycle. Ternary pulsation subdivision    | Presence in <i>ngodja</i> repertoire is coded by à<br>Absence is coded by 0<br>Missing information is coded by ?                                                                                                                                                                                                                                                                                                                                                                                                                                                                                                                                                                                                                                                                                                                                 |
| 300 | 20ter      | Twenty pulsations cycle. Ternary pulsation subdivision      | Presence in <i>nzokou</i> repertoire is coded by £<br>Absence is coded by 0<br>Missing information is coded by ?                                                                                                                                                                                                                                                                                                                                                                                                                                                                                                                                                                                                                                                                                                                                 |
| 301 | 24ter      | Twenty four pulsations cycle. Ternary pulsation subdivision | Presence in <i>nzokou</i> repertoire is coded by £<br>Presence in <i>deke</i> repertoire is coded by é<br>Presence in <i>nzobi</i> repertoire is coded by 2<br>Absence is coded by 0<br>Missing information is coded by ?                                                                                                                                                                                                                                                                                                                                                                                                                                                                                                                                                                                                                        |
| 302 | irrégulier | Irregular pulsation subdivision                             | Presence in <i>bubeyu</i> repertoire is coded by c                                                                                                                                                                                                                                                                                                                                                                                                                                                                                                                                                                                                                                                                                                                                                                                               |

|     |         |                               |                                                                                                                                                                                                                                                                                                                                                                                                                                                                                                                                                                                                                                                                                                                                                                                                                                                                                                                                                                                                                                                                                                                                                                                                                                                                                                                                                                         |
|-----|---------|-------------------------------|-------------------------------------------------------------------------------------------------------------------------------------------------------------------------------------------------------------------------------------------------------------------------------------------------------------------------------------------------------------------------------------------------------------------------------------------------------------------------------------------------------------------------------------------------------------------------------------------------------------------------------------------------------------------------------------------------------------------------------------------------------------------------------------------------------------------------------------------------------------------------------------------------------------------------------------------------------------------------------------------------------------------------------------------------------------------------------------------------------------------------------------------------------------------------------------------------------------------------------------------------------------------------------------------------------------------------------------------------------------------------|
|     |         |                               | Presence in <i>doka</i> repertoire is coded by d<br>Presence in <i>mbadi</i> repertoire is coded by e<br>Presence in <i>ngoye</i> repertoire is coded by 5<br>Presence in <i>mungala</i> repertoire is coded by 6<br>Absence is coded by 0<br>Missing information is coded by ?                                                                                                                                                                                                                                                                                                                                                                                                                                                                                                                                                                                                                                                                                                                                                                                                                                                                                                                                                                                                                                                                                         |
| 303 | scale 1 | Hexatonic with one semi-tone  | Presence in <i>bwiti misoko</i> repertoire is coded by *<br>Presence in <i>nyembe</i> repertoire is coded by #<br>Presence in <i>berceuse</i> repertoire is coded by •<br>Presence in <i>nzokou</i> repertoire is coded by £<br>Presence in <i>ologo</i> repertoire is coded by a<br>Presence in <i>ngodja</i> repertoire is coded by à<br>Presence in <i>doka</i> repertoire is coded by d<br>Presence in <i>mbadi</i> repertoire is coded by e<br>Presence in <i>deke</i> repertoire is coded by é<br>Presence in <i>issogha</i> repertoire is coded by g<br>Presence in <i>abire nkele</i> repertoire is coded by k<br>Presence in <i>mavasa</i> repertoire is coded by l<br>Presence in <i>ibwema</i> repertoire is coded by o<br>Presence in <i>makouma</i> repertoire is coded by s<br>Presence in <i>kunde</i> repertoire is coded by v<br>Presence in <i>mabandji</i> repertoire is coded by x<br>Presence in <i>minonze</i> repertoire is coded by y<br>Presence in <i>bwiti disumba</i> repertoire is coded by z<br>Presence in <i>lisimbu</i> repertoire is coded by 1<br>Presence in <i>nzobi</i> repertoire is coded by 2<br>Presence in <i>laka</i> repertoire is coded by 4<br>Presence in <i>mungala</i> repertoire is coded by 6<br>Presence in <i>mimbwiri</i> repertoire is coded by 9<br>Absence is coded by 0<br>Missing information is coded by ? |
| 304 | scale 2 | Hexatonic with two semi-tones | Presence in <i>ibwema</i> repertoire is coded by o<br>Presence in <i>makouma</i> repertoire is coded by s<br>Presence in <i>ngi</i> repertoire is coded by ù<br>Presence in <i>kunde</i> repertoire is coded by v<br>Presence in <i>lisimbu</i> repertoire is coded by 1<br>Presence in <i>nzobi</i> repertoire is coded by 2<br>Presence in <i>wuya</i> repertoire is coded by 8<br>Absence is coded by 0<br>Missing information is coded by ?                                                                                                                                                                                                                                                                                                                                                                                                                                                                                                                                                                                                                                                                                                                                                                                                                                                                                                                         |
| 305 | scale 3 | Pentatonic anhemitonic        | Presence in <i>berceuse</i> repertoire is coded by •<br>Presence in <i>ologo</i> repertoire is coded by a<br>Presence in <i>langu</i> repertoire is coded by ç<br>Presence in <i>onkila</i> repertoire is coded by h<br>Presence in <i>ngungu tek</i> repertoire is coded by i<br>Presence in <i>olamagha</i> repertoire is coded by j<br>Presence in <i>kenge</i> repertoire is coded by n<br>Presence in <i>nzobi</i> repertoire is coded by 2<br>Presence in <i>ngoye</i> repertoire is coded by 5<br>Presence in <i>mimbwiri</i> repertoire is coded by 9<br>Absence is coded by 0<br>Missing information is coded by ?                                                                                                                                                                                                                                                                                                                                                                                                                                                                                                                                                                                                                                                                                                                                             |



|     |         |                                 |                                                                                                                                                                                                                                                                                                                                                                                                                                                                                                                                                                                                                                                                                                                                                                                                                                                                                                                                                                                                                                                                                                                                                                                                                                                                                                                                                                                                                                                                                                                                                                                                                                  |
|-----|---------|---------------------------------|----------------------------------------------------------------------------------------------------------------------------------------------------------------------------------------------------------------------------------------------------------------------------------------------------------------------------------------------------------------------------------------------------------------------------------------------------------------------------------------------------------------------------------------------------------------------------------------------------------------------------------------------------------------------------------------------------------------------------------------------------------------------------------------------------------------------------------------------------------------------------------------------------------------------------------------------------------------------------------------------------------------------------------------------------------------------------------------------------------------------------------------------------------------------------------------------------------------------------------------------------------------------------------------------------------------------------------------------------------------------------------------------------------------------------------------------------------------------------------------------------------------------------------------------------------------------------------------------------------------------------------|
| 306 | scale 4 | Heptatonic with two semi-tones  | Presence in <i>berceuse</i> repertoire is coded by •<br>Presence in <i>boumba</i> repertoire is coded by \$<br>Presence in <i>ngodja</i> repertoire is coded by à<br>Presence in <i>mbumba</i> repertoire is coded by b<br>Presence in <i>bubeyu</i> repertoire is coded by c<br>Presence in <i>langu</i> repertoire is coded by ç<br>Presence in <i>doka</i> repertoire is coded by d<br>Presence in <i>mbadi</i> repertoire is coded by e<br>Presence in <i>deke</i> repertoire is coded by é<br>Presence in <i>bwiti koji</i> repertoire is coded by è<br>Presence in <i>mbudi</i> repertoire is coded by f<br>Presence in <i>mavasa</i> repertoire is coded by l<br>Presence in <i>mujaja</i> repertoire is coded by m<br>Presence in <i>ibwema</i> repertoire is coded by o<br>Presence in <i>mwiri</i> repertoire is coded by p<br>Presence in <i>mujisi</i> repertoire is coded by q<br>Presence in <i>makouma</i> repertoire is coded by s<br>Presence in <i>mundukwe</i> repertoire is coded by t<br>Presence in <i>kore</i> repertoire is coded by u<br>Presence in <i>ngi</i> repertoire is coded by ù<br>Presence in <i>minonze</i> repertoire is coded by y<br>Presence in <i>lisimbu</i> repertoire is coded by 1<br>Presence in <i>nzobi</i> repertoire is coded by 2<br>Presence in <i>ngwata</i> repertoire is coded by 3<br>Presence in <i>laka</i> repertoire is coded by 4<br>Presence in <i>ngoye</i> repertoire is coded by 5<br>Presence in <i>mungala</i> repertoire is coded by 6<br>Presence in <i>mimbwiri</i> repertoire is coded by 9<br>Absence is coded by 0<br>Missing information is coded by ? |
| 307 | scale 5 | Pentatonic with one semi-tone   | Presence in <i>ologo</i> repertoire is coded by a<br>Presence in <i>ngodja</i> repertoire is coded by à<br>Presence in <i>mbumba</i> repertoire is coded by b<br>Presence in <i>mavasa</i> repertoire is coded by l<br>Presence in <i>mwiri</i> repertoire is coded by p<br>Presence in <i>makouma</i> repertoire is coded by s<br>Presence in <i>kunde</i> repertoire is coded by v<br>Presence in <i>mabundi</i> repertoire is coded by w<br>Presence in <i>ngoye</i> repertoire is coded by 5<br>Presence in <i>mungala</i> repertoire is coded by 6<br>Presence in <i>wuya</i> repertoire is coded by 8<br>Presence in <i>mimbwiri</i> repertoire is coded by 9<br>Absence is coded by 0<br>Missing information is coded by ?                                                                                                                                                                                                                                                                                                                                                                                                                                                                                                                                                                                                                                                                                                                                                                                                                                                                                                |
| 308 | scale 6 | Hexatonic with three semi-tones | Presence in <i>mundukwe</i> repertoire is coded by t<br>Presence in <i>lisimbu</i> repertoire is coded by 1<br>Absence is coded by 0<br>Missing information is coded by ?                                                                                                                                                                                                                                                                                                                                                                                                                                                                                                                                                                                                                                                                                                                                                                                                                                                                                                                                                                                                                                                                                                                                                                                                                                                                                                                                                                                                                                                        |
| 309 | scale 7 | Tetratonic with one semi-tone   | Presence in <i>berceuse</i> repertoire is coded by •<br>Presence in <i>mopfougou</i> repertoire is coded by 7<br>Absence is coded by 0<br>Missing information is coded by ?                                                                                                                                                                                                                                                                                                                                                                                                                                                                                                                                                                                                                                                                                                                                                                                                                                                                                                                                                                                                                                                                                                                                                                                                                                                                                                                                                                                                                                                      |
| 310 | scale 8 | Tetratonic without semi-tone    | Presence in <i>berceuse</i> repertoire is coded by •<br>Presence in <i>nyembe</i> repertoire is coded by #                                                                                                                                                                                                                                                                                                                                                                                                                                                                                                                                                                                                                                                                                                                                                                                                                                                                                                                                                                                                                                                                                                                                                                                                                                                                                                                                                                                                                                                                                                                       |

|     |                      |                                  |                                                                                                                                                                                                                                                                                                                                                                                                   |
|-----|----------------------|----------------------------------|---------------------------------------------------------------------------------------------------------------------------------------------------------------------------------------------------------------------------------------------------------------------------------------------------------------------------------------------------------------------------------------------------|
|     |                      |                                  | Presence in <i>ngwata</i> repertoire is coded by 3<br>Presence in <i>mimbwiri</i> repertoire is coded by 7<br>Absence is coded by 0<br>Missing information is coded by ?                                                                                                                                                                                                                          |
| 311 | scale 9              | Nonatonic with six semi-tones    | Presence in <i>dijangu</i> repertoire is coded by r<br>Absence is coded by 0<br>Missing information is coded by ?                                                                                                                                                                                                                                                                                 |
| 312 | scale 10             | Pentatonic with two semi-tones   | Absence is coded by 0<br>Missing information is coded by ?                                                                                                                                                                                                                                                                                                                                        |
| 313 | scale 11             | Octatonic                        | Presence in <i>nzokou</i> repertoire is coded by £<br>Presence in <i>mbumba</i> repertoire is coded by b<br>Presence in <i>ibwema</i> repertoire is coded by o<br>Presence in <i>mundukwe</i> repertoire is coded by t<br>Presence in <i>minonze</i> repertoire is coded by y<br>Presence in <i>ngwata</i> repertoire is coded by 3<br>Absence is coded by 0<br>Missing information is coded by ? |
| 314 | scale 12             | Heptatonic with three semi-tones | Presence in <i>boumba</i> repertoire is coded by \$<br>Presence in <i>mundukwe</i> repertoire is coded by t<br>Absence is coded by 0<br>Missing information is coded by ?                                                                                                                                                                                                                         |
| 315 | scale13              | tritonic                         | Presence in <i>ngodja</i> repertoire is coded by à<br>Absence is coded by 0<br>Missing information is coded by ?                                                                                                                                                                                                                                                                                  |
| 316 | counterpoint         | Plurilinear process              | Absence is coded by 0<br>Presence is coded by 1<br>Missing information is coded by ?                                                                                                                                                                                                                                                                                                              |
| 317 | partial counterpoint | Plurilinear process              | Absence is coded by 0<br>Presence is coded by 1<br>Missing information is coded by ?                                                                                                                                                                                                                                                                                                              |
| 318 | homorythmie          | Plurilinear process              | Absence is coded by 0<br>Presence is coded by 1<br>Missing information is coded by ?                                                                                                                                                                                                                                                                                                              |
| 319 | responsorial         | Song form                        | Absence is coded by 0<br>Presence is coded by 1<br>Missing information is coded by ?                                                                                                                                                                                                                                                                                                              |
| 320 | antiphonal           | Song form                        | Absence is coded by 0<br>Presence is coded by 1<br>Missing information is coded by ?                                                                                                                                                                                                                                                                                                              |
| 321 | jodel                | Vocal technique                  | Absence is coded by 0<br>Presence is coded by 1<br>Missing information is coded by ?                                                                                                                                                                                                                                                                                                              |
| 322 | pseudo jodel         | Vocal technique                  | Absence is coded by 0<br>Presence is coded by 1<br>Missing information is coded by ?                                                                                                                                                                                                                                                                                                              |
